# Supplementary material for: Genome-wide identification and association analysis of informative SNPs of various nutri-nutraceutical traits in Buckwheat (Fagopyrum spp.)
Source: Frontiers journal article supplement (doi:10.3389/fpls.2025.1559621), 2025-04-24
Supplement: Table_2.xlsx [file Table_2.xlsx]

## Sheet: Sheet1
Supplementary Table 4 : Gene annotation of Buckwheat
Gene ID	Database	Database ID	Gene Function	Interpro ID	Interpro Gene Annotation	GO ID	Pathway
FtPinG0007197200.01.T01	Gene3D	G3DSA:2.40.30.10
FtPinG0007197200.01.T01	Gene3D	G3DSA:2.40.30.10
FtPinG0007197200.01.T01	Gene3D	G3DSA:2.40.30.10
FtPinG0007197200.01.T01	Gene3D	G3DSA:4.10.960.10
FtPinG0007197200.01.T01	Gene3D	G3DSA:4.10.960.10
FtPinG0007197200.01.T01	Pfam	PF00297	Ribosomal protein L3	IPR000597	Ribosomal protein L3	GO:0003735|GO:0005622|GO:0005840|GO:0006412
FtPinG0007197200.01.T01	MobiDBLite	mobidb-lite	consensus disorder prediction
FtPinG0007197200.01.T01	ProSitePatterns	PS00474	Ribosomal protein L3 signature.	IPR019926	Ribosomal protein L3, conserved site
FtPinG0007197200.01.T01	SUPERFAMILY	SSF50447		IPR009000	Translation protein, beta-barrel domain superfamily
FtPinG0007197200.01.T01	Gene3D	G3DSA:3.30.1430.10
FtPinG0006103300.01.T01	Gene3D	G3DSA:2.60.120.560
FtPinG0006103300.01.T01	SUPERFAMILY	SSF75005		IPR023296	Glycosyl hydrolase, five-bladed beta-propellor domain superfamily
FtPinG0006103300.01.T01	Pfam	PF08244	Glycosyl hydrolases family 32 C terminal	IPR013189	Glycosyl hydrolase family 32, C-terminal
FtPinG0006103300.01.T01	SMART	SM00640		IPR001362	Glycoside hydrolase, family 32	GO:0004553|GO:0005975
FtPinG0006103300.01.T01	SUPERFAMILY	SSF49899		IPR013320	Concanavalin A-like lectin/glucanase domain superfamily
FtPinG0006103300.01.T01	SUPERFAMILY	SSF49899		IPR013320	Concanavalin A-like lectin/glucanase domain superfamily
FtPinG0006103300.01.T01	Gene3D	G3DSA:2.115.10.20		IPR023296	Glycosyl hydrolase, five-bladed beta-propellor domain superfamily
FtPinG0006103300.01.T01	CDD	cd08996	GH32_B_Fructosidase		GH32_B_Fructosidase
FtPinG0006103300.01.T01	Pfam	PF00251	Glycosyl hydrolases family 32 N-terminal domain	IPR013148	Glycosyl hydrolase family 32, N-terminal
FtPinG0007905200.01.T01	ProSitePatterns	PS00152	ATP synthase alpha and beta subunits signature.	IPR020003	ATPase, alpha/beta subunit, nucleotide-binding domain, active site	GO:0005524	KEGG: 00190+3.6.3.14|KEGG: 00195+3.6.3.14|MetaCyc: PWY-7219
FtPinG0007905200.01.T01	Gene3D	G3DSA:2.40.30.20		IPR023366	ATP synthase subunit alpha, N-terminal domain-like superfamily		KEGG: 00190+3.6.3.14|KEGG: 00195+3.6.3.14|MetaCyc: PWY-7219
FtPinG0007905200.01.T01	CDD	cd01132	F1_ATPase_alpha	IPR033732	ATP synthase, F1 complex, alpha subunit nucleotide-binding domain	GO:0032559	KEGG: 00190+3.6.3.14|KEGG: 00195+3.6.3.14|MetaCyc: PWY-7219|Reactome: R-HSA-1268020|Reactome: R-HSA-163210|Reactome: R-HSA-8949613
FtPinG0007905200.01.T01	SUPERFAMILY	SSF47917
FtPinG0007905200.01.T01	TIGRFAM	TIGR00962	atpA: ATP synthase F1, alpha subunit	IPR005294	ATP synthase, F1 complex, alpha subunit	GO:0015986|GO:0045261|GO:0046933	KEGG: 00190+3.6.3.14|KEGG: 00195+3.6.3.14|MetaCyc: PWY-7219|Reactome: R-HSA-1268020|Reactome: R-HSA-163210|Reactome: R-HSA-8949613
FtPinG0007905200.01.T01	Pfam	PF00006	ATP synthase alpha/beta family, nucleotide-binding domain	IPR000194	ATPase, F1/V1/A1 complex, alpha/beta subunit, nucleotide-binding domain	GO:0005524	KEGG: 00190+3.6.3.14|KEGG: 00195+3.6.3.14|MetaCyc: PWY-7219
FtPinG0007905200.01.T01	Gene3D	G3DSA:1.20.150.20		IPR038376	ATP synthase, alpha subunit, C-terminal domain superfamily		KEGG: 00190+3.6.3.14|KEGG: 00195+3.6.3.14|MetaCyc: PWY-7219|Reactome: R-HSA-1268020|Reactome: R-HSA-163210|Reactome: R-HSA-8949613
FtPinG0007905200.01.T01	Gene3D	G3DSA:3.40.50.300
FtPinG0007905200.01.T01	SUPERFAMILY	SSF52540		IPR027417	P-loop containing nucleoside triphosphate hydrolase
FtPinG0007905200.01.T01	Pfam	PF02874	ATP synthase alpha/beta family, beta-barrel domain	IPR004100	ATPase, F1/V1/A1 complex, alpha/beta subunit, N-terminal domain	GO:0015992|GO:0046034	KEGG: 00190+3.6.3.14|KEGG: 00195+3.6.3.14|MetaCyc: PWY-7219
FtPinG0007905200.01.T01	PIRSF	PIRSF039088		IPR005294	ATP synthase, F1 complex, alpha subunit	GO:0015986|GO:0045261|GO:0046933	KEGG: 00190+3.6.3.14|KEGG: 00195+3.6.3.14|MetaCyc: PWY-7219|Reactome: R-HSA-1268020|Reactome: R-HSA-163210|Reactome: R-HSA-8949613
FtPinG0007905200.01.T01	SUPERFAMILY	SSF50615		IPR036121	ATPase, F1/V1/A1 complex, alpha/beta subunit, N-terminal domain superfamily	GO:0015992|GO:0046034	KEGG: 00190+3.6.3.14|KEGG: 00195+3.6.3.14|MetaCyc: PWY-7219
FtPinG0007905200.01.T01	Pfam	PF00306	ATP synthase alpha/beta chain, C terminal domain	IPR000793	ATP synthase, alpha subunit, C-terminal	GO:0015986	KEGG: 00190+3.6.3.14|KEGG: 00195+3.6.3.14|MetaCyc: PWY-7219|Reactome: R-HSA-1268020|Reactome: R-HSA-163210|Reactome: R-HSA-8949613
FtPinG0007905200.01.T01	Hamap	MF_01346	ATP synthase subunit alpha [atpA].	IPR005294	ATP synthase, F1 complex, alpha subunit	GO:0015986|GO:0045261|GO:0046933	KEGG: 00190+3.6.3.14|KEGG: 00195+3.6.3.14|MetaCyc: PWY-7219|Reactome: R-HSA-1268020|Reactome: R-HSA-163210|Reactome: R-HSA-8949613
FtPinG0009541700.01.T01	TIGRFAM	TIGR00946	2a69: auxin efflux carrier	IPR014024	Auxin efflux carrier, plant type
FtPinG0009541700.01.T01	MobiDBLite	mobidb-lite	consensus disorder prediction
FtPinG0009541700.01.T01	MobiDBLite	mobidb-lite	consensus disorder prediction
FtPinG0009541700.01.T01	Pfam	PF03547	Membrane transport protein	IPR004776	Membrane transport protein	GO:0016021|GO:0055085
FtPinG0008631200.01.T01	Coils	Coil
FtPinG0008631200.01.T01	Pfam	PF11712	Endoplasmic reticulum-based factor for assembly of V-ATPase	IPR021013	ATPase, vacuolar ER assembly factor, Vma12	GO:0070072
FtPinG0007507100.01.T01	ProSiteProfiles	PS51294	Myb-type HTH DNA-binding domain profile.	IPR017930	Myb domain
FtPinG0007507100.01.T01	ProSiteProfiles	PS51294	Myb-type HTH DNA-binding domain profile.	IPR017930	Myb domain
FtPinG0007507100.01.T01	SUPERFAMILY	SSF46689		IPR009057	Homeobox-like domain superfamily	GO:0003677
FtPinG0007507100.01.T01	Pfam	PF00249	Myb-like DNA-binding domain	IPR001005	SANT/Myb domain
FtPinG0007507100.01.T01	Pfam	PF00249	Myb-like DNA-binding domain	IPR001005	SANT/Myb domain
FtPinG0007507100.01.T01	Gene3D	G3DSA:1.10.10.60
FtPinG0007507100.01.T01	CDD	cd00167	SANT	IPR001005	SANT/Myb domain
FtPinG0007507100.01.T01	MobiDBLite	mobidb-lite	consensus disorder prediction
FtPinG0007507100.01.T01	CDD	cd00167	SANT	IPR001005	SANT/Myb domain
FtPinG0007507100.01.T01	Gene3D	G3DSA:1.10.10.60
FtPinG0007507100.01.T01	SMART	SM00717		IPR001005	SANT/Myb domain
FtPinG0007507100.01.T01	SMART	SM00717		IPR001005	SANT/Myb domain
FtPinG0008784600.01.T01	PRINTS	PR00385	P450 superfamily signature	IPR001128	Cytochrome P450	GO:0005506|GO:0016705|GO:0020037|GO:0055114
FtPinG0008784600.01.T01	PRINTS	PR00385	P450 superfamily signature	IPR001128	Cytochrome P450	GO:0005506|GO:0016705|GO:0020037|GO:0055114
FtPinG0008784600.01.T01	PRINTS	PR00385	P450 superfamily signature	IPR001128	Cytochrome P450	GO:0005506|GO:0016705|GO:0020037|GO:0055114
FtPinG0008784600.01.T01	PRINTS	PR00385	P450 superfamily signature	IPR001128	Cytochrome P450	GO:0005506|GO:0016705|GO:0020037|GO:0055114
FtPinG0008784600.01.T01	ProSitePatterns	PS00086	Cytochrome P450 cysteine heme-iron ligand signature.	IPR017972	Cytochrome P450, conserved site	GO:0016705|GO:0055114
FtPinG0008784600.01.T01	PRINTS	PR00463	E-class P450 group I signature	IPR002401	Cytochrome P450, E-class, group I	GO:0005506|GO:0016705|GO:0020037|GO:0055114
FtPinG0008784600.01.T01	PRINTS	PR00463	E-class P450 group I signature	IPR002401	Cytochrome P450, E-class, group I	GO:0005506|GO:0016705|GO:0020037|GO:0055114
FtPinG0008784600.01.T01	PRINTS	PR00463	E-class P450 group I signature	IPR002401	Cytochrome P450, E-class, group I	GO:0005506|GO:0016705|GO:0020037|GO:0055114
FtPinG0008784600.01.T01	PRINTS	PR00463	E-class P450 group I signature	IPR002401	Cytochrome P450, E-class, group I	GO:0005506|GO:0016705|GO:0020037|GO:0055114
FtPinG0008784600.01.T01	Gene3D	G3DSA:1.10.630.10		IPR036396	Cytochrome P450 superfamily	GO:0005506|GO:0016705|GO:0020037|GO:0055114
FtPinG0008784600.01.T01	SUPERFAMILY	SSF48264		IPR036396	Cytochrome P450 superfamily	GO:0005506|GO:0016705|GO:0020037|GO:0055114
FtPinG0008784600.01.T01	Pfam	PF00067	Cytochrome P450	IPR001128	Cytochrome P450	GO:0005506|GO:0016705|GO:0020037|GO:0055114
FtPinG0006636800.01.T01	Pfam	PF03031	NLI interacting factor-like phosphatase	IPR004274	FCP1 homology domain
FtPinG0006636800.01.T01	SMART	SM00292		IPR001357	BRCT domain
FtPinG0006636800.01.T01	CDD	cd00027	BRCT	IPR001357	BRCT domain
FtPinG0006636800.01.T01	SMART	SM00577		IPR004274	FCP1 homology domain
FtPinG0006636800.01.T01	Gene3D	G3DSA:3.40.50.10190		IPR036420	BRCT domain superfamily
FtPinG0006636800.01.T01	MobiDBLite	mobidb-lite	consensus disorder prediction
FtPinG0006636800.01.T01	SUPERFAMILY	SSF56784		IPR036412	HAD-like superfamily
FtPinG0006636800.01.T01	TIGRFAM	TIGR02250	FCP1_euk: FCP1-like phosphatase, phosphatase domain	IPR011947	FCP1-like phosphatase, phosphatase domain	GO:0004721|GO:0005634	KEGG: 04658+3.1.3.16|KEGG: 04660+3.1.3.16|Reactome: R-HSA-112382|Reactome: R-HSA-113418|Reactome: R-HSA-167152|Reactome: R-HSA-167158|Reactome: R-HSA-167200|Reactome: R-HSA-167238|Reactome: R-HSA-167242|Reactome: R-HSA-167243|Reactome: R-HSA-167246|Reactome: R-HSA-167287|Reactome: R-HSA-167290|Reactome: R-HSA-674695|Reactome: R-HSA-6796648|Reactome: R-HSA-75955
FtPinG0006636800.01.T01	ProSiteProfiles	PS50969	FCP1 homology domain profile.	IPR004274	FCP1 homology domain
FtPinG0006636800.01.T01	Gene3D	G3DSA:3.40.50.1000		IPR023214	HAD superfamily
FtPinG0006636800.01.T01	SUPERFAMILY	SSF52113		IPR036420	BRCT domain superfamily
FtPinG0006636800.01.T01	CDD	cd07521	HAD_FCP1-like
FtPinG0006636800.01.T01	ProSiteProfiles	PS50172	BRCT domain profile.	IPR001357	BRCT domain
FtPinG0006636800.01.T01	Pfam	PF00533	BRCA1 C Terminus (BRCT) domain	IPR001357	BRCT domain
FtPinG0006787600.01.T01	Pfam	PF03242	Late embryogenesis abundant protein	IPR004926	Late embryogenesis abundant protein, LEA5-type	GO:0006950
FtPinG0007908700.01.T01	Pfam	PF00361	Proton-conducting membrane transporter	IPR001750	NADH:quinone oxidoreductase/Mrp antiporter, membrane subunit		Reactome: R-HSA-611105|Reactome: R-HSA-6799198
FtPinG0009547000.01.T01	SUPERFAMILY	SSF52058
FtPinG0009547000.01.T01	ProSitePatterns	PS00108	Serine/Threonine protein kinases active-site signature.	IPR008271	Serine/threonine-protein kinase, active site	GO:0004672|GO:0006468
FtPinG0009547000.01.T01	Pfam	PF13855	Leucine rich repeat	IPR001611	Leucine-rich repeat	GO:0005515
FtPinG0009547000.01.T01	Gene3D	G3DSA:3.80.10.10		IPR032675	Leucine-rich repeat domain superfamily
FtPinG0009547000.01.T01	Gene3D	G3DSA:1.10.510.10
FtPinG0009547000.01.T01	Gene3D	G3DSA:3.80.10.10		IPR032675	Leucine-rich repeat domain superfamily
FtPinG0009547000.01.T01	ProSiteProfiles	PS50011	Protein kinase domain profile.	IPR000719	Protein kinase domain	GO:0004672|GO:0005524|GO:0006468
FtPinG0009547000.01.T01	SUPERFAMILY	SSF56112		IPR011009	Protein kinase-like domain superfamily
FtPinG0009547000.01.T01	Pfam	PF07714	Protein tyrosine kinase	IPR001245	Serine-threonine/tyrosine-protein kinase, catalytic domain	GO:0004672|GO:0006468
FtPinG0009547000.01.T01	SMART	SM00220		IPR000719	Protein kinase domain	GO:0004672|GO:0005524|GO:0006468
FtPinG0009547000.01.T01	Gene3D	G3DSA:3.30.200.20
FtPinG0009547000.01.T01	ProSitePatterns	PS00107	Protein kinases ATP-binding region signature.	IPR017441	Protein kinase, ATP binding site	GO:0005524
FtPinG0009547000.01.T01	SUPERFAMILY	SSF52047
FtPinG0009547000.01.T01	Pfam	PF00560	Leucine Rich Repeat	IPR001611	Leucine-rich repeat	GO:0005515
FtPinG0007196500.01.T01	Pfam	PF01535	PPR repeat	IPR002885	Pentatricopeptide repeat
FtPinG0007196500.01.T01	Pfam	PF01535	PPR repeat	IPR002885	Pentatricopeptide repeat
FtPinG0007196500.01.T01	Pfam	PF01535	PPR repeat	IPR002885	Pentatricopeptide repeat
FtPinG0007196500.01.T01	ProSiteProfiles	PS51375	Pentatricopeptide (PPR) repeat profile.	IPR002885	Pentatricopeptide repeat
FtPinG0007196500.01.T01	Gene3D	G3DSA:1.25.40.10		IPR011990	Tetratricopeptide-like helical domain superfamily	GO:0005515
FtPinG0007196500.01.T01	Gene3D	G3DSA:1.25.40.10		IPR011990	Tetratricopeptide-like helical domain superfamily	GO:0005515
FtPinG0007196500.01.T01	Gene3D	G3DSA:1.25.40.10		IPR011990	Tetratricopeptide-like helical domain superfamily	GO:0005515
FtPinG0007196500.01.T01	ProSiteProfiles	PS51375	Pentatricopeptide (PPR) repeat profile.	IPR002885	Pentatricopeptide repeat
FtPinG0007196500.01.T01	ProSiteProfiles	PS51375	Pentatricopeptide (PPR) repeat profile.	IPR002885	Pentatricopeptide repeat
FtPinG0007196500.01.T01	ProSiteProfiles	PS51375	Pentatricopeptide (PPR) repeat profile.	IPR002885	Pentatricopeptide repeat
FtPinG0007196500.01.T01	Gene3D	G3DSA:1.25.40.10		IPR011990	Tetratricopeptide-like helical domain superfamily	GO:0005515
FtPinG0007196500.01.T01	ProSiteProfiles	PS51375	Pentatricopeptide (PPR) repeat profile.	IPR002885	Pentatricopeptide repeat
FtPinG0007196500.01.T01	ProSiteProfiles	PS51375	Pentatricopeptide (PPR) repeat profile.	IPR002885	Pentatricopeptide repeat
FtPinG0007196500.01.T01	Gene3D	G3DSA:1.25.40.10		IPR011990	Tetratricopeptide-like helical domain superfamily	GO:0005515
FtPinG0007196500.01.T01	SUPERFAMILY	SSF81901
FtPinG0007196500.01.T01	ProSiteProfiles	PS51375	Pentatricopeptide (PPR) repeat profile.	IPR002885	Pentatricopeptide repeat
FtPinG0007196500.01.T01	ProSiteProfiles	PS51375	Pentatricopeptide (PPR) repeat profile.	IPR002885	Pentatricopeptide repeat
FtPinG0007196500.01.T01	ProSiteProfiles	PS51375	Pentatricopeptide (PPR) repeat profile.	IPR002885	Pentatricopeptide repeat
FtPinG0007196500.01.T01	TIGRFAM	TIGR00756	PPR: pentatricopeptide repeat domain	IPR002885	Pentatricopeptide repeat
FtPinG0007196500.01.T01	TIGRFAM	TIGR00756	PPR: pentatricopeptide repeat domain	IPR002885	Pentatricopeptide repeat
FtPinG0007196500.01.T01	TIGRFAM	TIGR00756	PPR: pentatricopeptide repeat domain	IPR002885	Pentatricopeptide repeat
FtPinG0007196500.01.T01	TIGRFAM	TIGR00756	PPR: pentatricopeptide repeat domain	IPR002885	Pentatricopeptide repeat
FtPinG0007196500.01.T01	TIGRFAM	TIGR00756	PPR: pentatricopeptide repeat domain	IPR002885	Pentatricopeptide repeat
FtPinG0007196500.01.T01	TIGRFAM	TIGR00756	PPR: pentatricopeptide repeat domain	IPR002885	Pentatricopeptide repeat
FtPinG0007196500.01.T01	TIGRFAM	TIGR00756	PPR: pentatricopeptide repeat domain	IPR002885	Pentatricopeptide repeat
FtPinG0007196500.01.T01	TIGRFAM	TIGR00756	PPR: pentatricopeptide repeat domain	IPR002885	Pentatricopeptide repeat
FtPinG0007196500.01.T01	ProSiteProfiles	PS51375	Pentatricopeptide (PPR) repeat profile.	IPR002885	Pentatricopeptide repeat
FtPinG0007196500.01.T01	ProSiteProfiles	PS51375	Pentatricopeptide (PPR) repeat profile.	IPR002885	Pentatricopeptide repeat
FtPinG0007196500.01.T01	ProSiteProfiles	PS51375	Pentatricopeptide (PPR) repeat profile.	IPR002885	Pentatricopeptide repeat
FtPinG0007196500.01.T01	ProSiteProfiles	PS51375	Pentatricopeptide (PPR) repeat profile.	IPR002885	Pentatricopeptide repeat
FtPinG0007196500.01.T01	Pfam	PF13041	PPR repeat family	IPR002885	Pentatricopeptide repeat
FtPinG0007196500.01.T01	Pfam	PF13041	PPR repeat family	IPR002885	Pentatricopeptide repeat
FtPinG0007196500.01.T01	Pfam	PF13041	PPR repeat family	IPR002885	Pentatricopeptide repeat
FtPinG0007196500.01.T01	Pfam	PF13041	PPR repeat family	IPR002885	Pentatricopeptide repeat
FtPinG0007196500.01.T01	Pfam	PF13041	PPR repeat family	IPR002885	Pentatricopeptide repeat
FtPinG0007196500.01.T01	ProSiteProfiles	PS51375	Pentatricopeptide (PPR) repeat profile.	IPR002885	Pentatricopeptide repeat
FtPinG0008785000.01.T01	PRINTS	PR00463	E-class P450 group I signature	IPR002401	Cytochrome P450, E-class, group I	GO:0005506|GO:0016705|GO:0020037|GO:0055114
FtPinG0008785000.01.T01	PRINTS	PR00463	E-class P450 group I signature	IPR002401	Cytochrome P450, E-class, group I	GO:0005506|GO:0016705|GO:0020037|GO:0055114
FtPinG0008785000.01.T01	PRINTS	PR00463	E-class P450 group I signature	IPR002401	Cytochrome P450, E-class, group I	GO:0005506|GO:0016705|GO:0020037|GO:0055114
FtPinG0008785000.01.T01	PRINTS	PR00463	E-class P450 group I signature	IPR002401	Cytochrome P450, E-class, group I	GO:0005506|GO:0016705|GO:0020037|GO:0055114
FtPinG0008785000.01.T01	Pfam	PF00067	Cytochrome P450	IPR001128	Cytochrome P450	GO:0005506|GO:0016705|GO:0020037|GO:0055114
FtPinG0008785000.01.T01	Gene3D	G3DSA:1.10.630.10		IPR036396	Cytochrome P450 superfamily	GO:0005506|GO:0016705|GO:0020037|GO:0055114
FtPinG0008785000.01.T01	Gene3D	G3DSA:1.10.630.10		IPR036396	Cytochrome P450 superfamily	GO:0005506|GO:0016705|GO:0020037|GO:0055114
FtPinG0008785000.01.T01	SUPERFAMILY	SSF48264		IPR036396	Cytochrome P450 superfamily	GO:0005506|GO:0016705|GO:0020037|GO:0055114
FtPinG0006323700.01.T01	Pfam	PF00069	Protein kinase domain	IPR000719	Protein kinase domain	GO:0004672|GO:0005524|GO:0006468
FtPinG0006323700.01.T01	CDD	cd14066	STKc_IRAK
FtPinG0006323700.01.T01	Gene3D	G3DSA:1.10.510.10
FtPinG0006323700.01.T01	SUPERFAMILY	SSF56112		IPR011009	Protein kinase-like domain superfamily
FtPinG0006323700.01.T01	Gene3D	G3DSA:3.30.200.20
FtPinG0006323700.01.T01	ProSitePatterns	PS00108	Serine/Threonine protein kinases active-site signature.	IPR008271	Serine/threonine-protein kinase, active site	GO:0004672|GO:0006468
FtPinG0006323700.01.T01	ProSiteProfiles	PS50011	Protein kinase domain profile.	IPR000719	Protein kinase domain	GO:0004672|GO:0005524|GO:0006468
FtPinG0006323700.01.T01	PIRSF	PIRSF000654
FtPinG0006323700.01.T01	SMART	SM00220		IPR000719	Protein kinase domain	GO:0004672|GO:0005524|GO:0006468
FtPinG0004725500.01.T01	Gene3D	G3DSA:2.60.40.150		IPR035892	C2 domain superfamily
FtPinG0004725500.01.T01	ProSiteProfiles	PS50004	C2 domain profile.	IPR000008	C2 domain
FtPinG0004725500.01.T01	SMART	SM00239		IPR000008	C2 domain
FtPinG0004725500.01.T01	SMART	SM00239		IPR000008	C2 domain
FtPinG0004725500.01.T01	CDD	cd00030	C2
FtPinG0004725500.01.T01	ProSiteProfiles	PS50004	C2 domain profile.	IPR000008	C2 domain
FtPinG0004725500.01.T01	Gene3D	G3DSA:2.60.40.150		IPR035892	C2 domain superfamily
FtPinG0004725500.01.T01	Pfam	PF00168	C2 domain	IPR000008	C2 domain
FtPinG0004725500.01.T01	Pfam	PF00168	C2 domain	IPR000008	C2 domain
FtPinG0004725500.01.T01	PRINTS	PR00360	C2 domain signature	IPR000008	C2 domain
FtPinG0004725500.01.T01	PRINTS	PR00360	C2 domain signature	IPR000008	C2 domain
FtPinG0004725500.01.T01	PRINTS	PR00360	C2 domain signature	IPR000008	C2 domain
FtPinG0004725500.01.T01	Pfam	PF17047	Synaptotagmin-like mitochondrial-lipid-binding domain	IPR031468	Synaptotagmin-like mitochondrial-lipid-binding domain	GO:0008289	Reactome: R-HSA-1660662
FtPinG0004725500.01.T01	SUPERFAMILY	SSF49562
FtPinG0004725500.01.T01	SUPERFAMILY	SSF49562
FtPinG0006164200.01.T01	MobiDBLite	mobidb-lite	consensus disorder prediction
FtPinG0006637600.01.T01	SUPERFAMILY	SSF54928		IPR035979	RNA-binding domain superfamily	GO:0003676
FtPinG0006637600.01.T01	Pfam	PF04059	RNA recognition motif 2	IPR007201	Mei2/Mei2-like, C-terminal RNA recognition motif
FtPinG0006637600.01.T01	MobiDBLite	mobidb-lite	consensus disorder prediction
FtPinG0006637600.01.T01	ProSiteProfiles	PS50102	Eukaryotic RNA Recognition Motif (RRM) profile.	IPR000504	RNA recognition motif domain	GO:0003676
FtPinG0006637600.01.T01	SMART	SM00360		IPR000504	RNA recognition motif domain	GO:0003676
FtPinG0006637600.01.T01	SMART	SM00360		IPR000504	RNA recognition motif domain	GO:0003676
FtPinG0006637600.01.T01	SMART	SM00360		IPR000504	RNA recognition motif domain	GO:0003676
FtPinG0006637600.01.T01	CDD	cd12529	RRM2_MEI2_like
FtPinG0006637600.01.T01	CDD	cd12531	RRM3_MEI2_like	IPR034454	MEI2-like, RNA recognition motif 3
FtPinG0006637600.01.T01	Gene3D	G3DSA:3.30.70.330		IPR012677	Nucleotide-binding alpha-beta plait domain superfamily
FtPinG0006637600.01.T01	Gene3D	G3DSA:3.30.70.330		IPR012677	Nucleotide-binding alpha-beta plait domain superfamily
FtPinG0006637600.01.T01	MobiDBLite	mobidb-lite	consensus disorder prediction
FtPinG0006637600.01.T01	Pfam	PF00076	RNA recognition motif. (a.k.a. RRM, RBD, or RNP domain)	IPR000504	RNA recognition motif domain	GO:0003676
FtPinG0006637600.01.T01	Pfam	PF00076	RNA recognition motif. (a.k.a. RRM, RBD, or RNP domain)	IPR000504	RNA recognition motif domain	GO:0003676
FtPinG0006637600.01.T01	CDD	cd12524	RRM1_MEI2_like	IPR034453	MEI2-like, RNA recognition motif 1
FtPinG0006637600.01.T01	SUPERFAMILY	SSF54928		IPR035979	RNA-binding domain superfamily	GO:0003676
FtPinG0006637600.01.T01	ProSiteProfiles	PS50102	Eukaryotic RNA Recognition Motif (RRM) profile.	IPR000504	RNA recognition motif domain	GO:0003676
FtPinG0004865100.01.T01	Pfam	PF01535	PPR repeat	IPR002885	Pentatricopeptide repeat
FtPinG0004865100.01.T01	Pfam	PF01535	PPR repeat	IPR002885	Pentatricopeptide repeat
FtPinG0004865100.01.T01	Pfam	PF01535	PPR repeat	IPR002885	Pentatricopeptide repeat
FtPinG0004865100.01.T01	ProSiteProfiles	PS51375	Pentatricopeptide (PPR) repeat profile.	IPR002885	Pentatricopeptide repeat
FtPinG0004865100.01.T01	ProSiteProfiles	PS51375	Pentatricopeptide (PPR) repeat profile.	IPR002885	Pentatricopeptide repeat
FtPinG0004865100.01.T01	ProSiteProfiles	PS51375	Pentatricopeptide (PPR) repeat profile.	IPR002885	Pentatricopeptide repeat
FtPinG0004865100.01.T01	ProSiteProfiles	PS51375	Pentatricopeptide (PPR) repeat profile.	IPR002885	Pentatricopeptide repeat
FtPinG0004865100.01.T01	ProSiteProfiles	PS51375	Pentatricopeptide (PPR) repeat profile.	IPR002885	Pentatricopeptide repeat
FtPinG0004865100.01.T01	Gene3D	G3DSA:1.25.40.10		IPR011990	Tetratricopeptide-like helical domain superfamily	GO:0005515
FtPinG0004865100.01.T01	Pfam	PF13041	PPR repeat family	IPR002885	Pentatricopeptide repeat
FtPinG0004865100.01.T01	Pfam	PF13041	PPR repeat family	IPR002885	Pentatricopeptide repeat
FtPinG0004865100.01.T01	Pfam	PF13041	PPR repeat family	IPR002885	Pentatricopeptide repeat
FtPinG0004865100.01.T01	MobiDBLite	mobidb-lite	consensus disorder prediction
FtPinG0004865100.01.T01	TIGRFAM	TIGR00756	PPR: pentatricopeptide repeat domain	IPR002885	Pentatricopeptide repeat
FtPinG0004865100.01.T01	TIGRFAM	TIGR00756	PPR: pentatricopeptide repeat domain	IPR002885	Pentatricopeptide repeat
FtPinG0004865100.01.T01	TIGRFAM	TIGR00756	PPR: pentatricopeptide repeat domain	IPR002885	Pentatricopeptide repeat
FtPinG0004865100.01.T01	TIGRFAM	TIGR00756	PPR: pentatricopeptide repeat domain	IPR002885	Pentatricopeptide repeat
FtPinG0004865100.01.T01	TIGRFAM	TIGR00756	PPR: pentatricopeptide repeat domain	IPR002885	Pentatricopeptide repeat
FtPinG0004865100.01.T01	TIGRFAM	TIGR00756	PPR: pentatricopeptide repeat domain	IPR002885	Pentatricopeptide repeat
FtPinG0004865100.01.T01	TIGRFAM	TIGR00756	PPR: pentatricopeptide repeat domain	IPR002885	Pentatricopeptide repeat
FtPinG0004865100.01.T01	TIGRFAM	TIGR00756	PPR: pentatricopeptide repeat domain	IPR002885	Pentatricopeptide repeat
FtPinG0004865100.01.T01	ProSiteProfiles	PS51375	Pentatricopeptide (PPR) repeat profile.	IPR002885	Pentatricopeptide repeat
FtPinG0004865100.01.T01	ProSiteProfiles	PS51375	Pentatricopeptide (PPR) repeat profile.	IPR002885	Pentatricopeptide repeat
FtPinG0004865100.01.T01	Gene3D	G3DSA:1.25.40.10		IPR011990	Tetratricopeptide-like helical domain superfamily	GO:0005515
FtPinG0004865100.01.T01	Gene3D	G3DSA:1.25.40.10		IPR011990	Tetratricopeptide-like helical domain superfamily	GO:0005515
FtPinG0004865100.01.T01	ProSiteProfiles	PS51375	Pentatricopeptide (PPR) repeat profile.	IPR002885	Pentatricopeptide repeat
FtPinG0004865100.01.T01	ProSiteProfiles	PS51375	Pentatricopeptide (PPR) repeat profile.	IPR002885	Pentatricopeptide repeat
FtPinG0004865100.01.T01	ProSiteProfiles	PS51375	Pentatricopeptide (PPR) repeat profile.	IPR002885	Pentatricopeptide repeat
FtPinG0006637600.01.T02	SUPERFAMILY	SSF54928		IPR035979	RNA-binding domain superfamily	GO:0003676
FtPinG0006637600.01.T02	Pfam	PF04059	RNA recognition motif 2	IPR007201	Mei2/Mei2-like, C-terminal RNA recognition motif
FtPinG0006637600.01.T02	MobiDBLite	mobidb-lite	consensus disorder prediction
FtPinG0006637600.01.T02	ProSiteProfiles	PS50102	Eukaryotic RNA Recognition Motif (RRM) profile.	IPR000504	RNA recognition motif domain	GO:0003676
FtPinG0006637600.01.T02	MobiDBLite	mobidb-lite	consensus disorder prediction
FtPinG0006637600.01.T02	SMART	SM00360		IPR000504	RNA recognition motif domain	GO:0003676
FtPinG0006637600.01.T02	SMART	SM00360		IPR000504	RNA recognition motif domain	GO:0003676
FtPinG0006637600.01.T02	SMART	SM00360		IPR000504	RNA recognition motif domain	GO:0003676
FtPinG0006637600.01.T02	CDD	cd12529	RRM2_MEI2_like
FtPinG0006637600.01.T02	CDD	cd12531	RRM3_MEI2_like	IPR034454	MEI2-like, RNA recognition motif 3
FtPinG0006637600.01.T02	Gene3D	G3DSA:3.30.70.330		IPR012677	Nucleotide-binding alpha-beta plait domain superfamily
FtPinG0006637600.01.T02	Gene3D	G3DSA:3.30.70.330		IPR012677	Nucleotide-binding alpha-beta plait domain superfamily
FtPinG0006637600.01.T02	Pfam	PF00076	RNA recognition motif. (a.k.a. RRM, RBD, or RNP domain)	IPR000504	RNA recognition motif domain	GO:0003676
FtPinG0006637600.01.T02	Pfam	PF00076	RNA recognition motif. (a.k.a. RRM, RBD, or RNP domain)	IPR000504	RNA recognition motif domain	GO:0003676
FtPinG0006637600.01.T02	CDD	cd12524	RRM1_MEI2_like	IPR034453	MEI2-like, RNA recognition motif 1
FtPinG0006637600.01.T02	SUPERFAMILY	SSF54928		IPR035979	RNA-binding domain superfamily	GO:0003676
FtPinG0006637600.01.T02	ProSiteProfiles	PS50102	Eukaryotic RNA Recognition Motif (RRM) profile.	IPR000504	RNA recognition motif domain	GO:0003676
FtPinG0005258100.01.T01	Gene3D	G3DSA:1.10.110.10
FtPinG0005258100.01.T01	CDD	cd01959	nsLTP2	IPR033872	Non-specific lipid-transfer protein type 2	GO:0006869
FtPinG0005258100.01.T01	SUPERFAMILY	SSF47699		IPR036312	Bifunctional inhibitor/plant lipid transfer protein/seed storage helical domain superfamily
FtPinG0005258100.01.T01	Pfam	PF14368	Probable lipid transfer	IPR016140	Bifunctional inhibitor/plant lipid transfer protein/seed storage helical domain
FtPinG0001547800.01.T01	PRINTS	PR01546	Saccharomyces cerevisiae 73.5kDa hypothetical protein signature	IPR004353	Vacuolar fusion protein Mon1		Reactome: R-HSA-8876198
FtPinG0001547800.01.T01	PRINTS	PR01546	Saccharomyces cerevisiae 73.5kDa hypothetical protein signature	IPR004353	Vacuolar fusion protein Mon1		Reactome: R-HSA-8876198
FtPinG0001547800.01.T01	PRINTS	PR01546	Saccharomyces cerevisiae 73.5kDa hypothetical protein signature	IPR004353	Vacuolar fusion protein Mon1		Reactome: R-HSA-8876198
FtPinG0001547800.01.T01	Pfam	PF03164	Trafficking protein Mon1	IPR004353	Vacuolar fusion protein Mon1		Reactome: R-HSA-8876198
FtPinG0005599400.01.T01	MobiDBLite	mobidb-lite	consensus disorder prediction
FtPinG0008630800.01.T01	Gene3D	G3DSA:3.30.470.100
FtPinG0008630800.01.T01	Pfam	PF05770	Inositol 1, 3, 4-trisphosphate 5/6-kinase	IPR008656	Inositol-tetrakisphosphate 1-kinase	GO:0000287|GO:0005524|GO:0005622|GO:0032957|GO:0047325|GO:0052725|GO:0052726	KEGG: 00562+2.7.1.134+2.7.1.159|KEGG: 04070+2.7.1.159|MetaCyc: PWY-4661|MetaCyc: PWY-6362|MetaCyc: PWY-6365|MetaCyc: PWY-6366|MetaCyc: PWY-6554|Reactome: R-HSA-1855167|Reactome: R-HSA-1855204|Reactome: R-HSA-983231
FtPinG0008630800.01.T01	SUPERFAMILY	SSF56059
FtPinG0008630800.01.T01	PIRSF	PIRSF038186		IPR008656	Inositol-tetrakisphosphate 1-kinase	GO:0000287|GO:0005524|GO:0005622|GO:0032957|GO:0047325|GO:0052725|GO:0052726	KEGG: 00562+2.7.1.134+2.7.1.159|KEGG: 04070+2.7.1.159|MetaCyc: PWY-4661|MetaCyc: PWY-6362|MetaCyc: PWY-6365|MetaCyc: PWY-6366|MetaCyc: PWY-6554|Reactome: R-HSA-1855167|Reactome: R-HSA-1855204|Reactome: R-HSA-983231
FtPinG0007534500.01.T02	Pfam	PF16760	Starch/carbohydrate-binding module (family 53)	IPR005085	Carbohydrate binding module family 25	GO:2001070
FtPinG0007534500.01.T02	Pfam	PF16760	Starch/carbohydrate-binding module (family 53)	IPR005085	Carbohydrate binding module family 25	GO:2001070
FtPinG0007534500.01.T02	Pfam	PF16760	Starch/carbohydrate-binding module (family 53)	IPR005085	Carbohydrate binding module family 25	GO:2001070
FtPinG0007534500.01.T02	Pfam	PF00534	Glycosyl transferases group 1	IPR001296	Glycosyl transferase, family 1
FtPinG0007534500.01.T02	Coils	Coil
FtPinG0007534500.01.T02	SUPERFAMILY	SSF81296		IPR014756	Immunoglobulin E-set
FtPinG0007534500.01.T02	Gene3D	G3DSA:3.40.50.2000
FtPinG0007534500.01.T02	Gene3D	G3DSA:3.40.50.2000
FtPinG0007534500.01.T02	SUPERFAMILY	SSF53756
FtPinG0007534500.01.T02	Coils	Coil
FtPinG0007534500.01.T02	Gene3D	G3DSA:2.60.40.10		IPR013783	Immunoglobulin-like fold
FtPinG0007534500.01.T02	Gene3D	G3DSA:3.40.50.2000
FtPinG0007534500.01.T02	MobiDBLite	mobidb-lite	consensus disorder prediction
FtPinG0007534500.01.T02	Pfam	PF08323	Starch synthase catalytic domain	IPR013534	Starch synthase, catalytic domain		KEGG: 00500+2.4.1.21|MetaCyc: PWY-622
FtPinG0007534500.01.T02	Gene3D	G3DSA:2.60.40.10		IPR013783	Immunoglobulin-like fold
FtPinG0007534500.01.T02	CDD	cd03791	GT1_Glycogen_synthase_DULL1_like
FtPinG0007534500.01.T02	SMART	SM01066		IPR005085	Carbohydrate binding module family 25	GO:2001070
FtPinG0007534500.01.T02	SMART	SM01066		IPR005085	Carbohydrate binding module family 25	GO:2001070
FtPinG0007534500.01.T02	SMART	SM01066		IPR005085	Carbohydrate binding module family 25	GO:2001070
FtPinG0007534500.01.T02	Hamap	MF_00484	Glycogen synthase [glgA].	IPR011835	Bacterial/plant glycogen synthase	GO:0004373	KEGG: 00500+2.4.1.21|MetaCyc: PWY-622
FtPinG0006999300.01.T01	ProSitePatterns	PS00028	Zinc finger C2H2 type domain signature.	IPR013087	Zinc finger C2H2-type	GO:0003676
FtPinG0006999300.01.T01	SUPERFAMILY	SSF57667		IPR036236	Zinc finger C2H2 superfamily
FtPinG0006999300.01.T01	ProSitePatterns	PS00028	Zinc finger C2H2 type domain signature.	IPR013087	Zinc finger C2H2-type	GO:0003676
FtPinG0006999300.01.T01	MobiDBLite	mobidb-lite	consensus disorder prediction
FtPinG0006999300.01.T01	Pfam	PF13912	C2H2-type zinc finger
FtPinG0006999300.01.T01	Pfam	PF13912	C2H2-type zinc finger
FtPinG0006999300.01.T01	SMART	SM00355		IPR013087	Zinc finger C2H2-type	GO:0003676
FtPinG0006999300.01.T01	SMART	SM00355		IPR013087	Zinc finger C2H2-type	GO:0003676
FtPinG0006999300.01.T01	ProSiteProfiles	PS50157	Zinc finger C2H2 type domain profile.	IPR013087	Zinc finger C2H2-type	GO:0003676
FtPinG0006999300.01.T01	ProSiteProfiles	PS50157	Zinc finger C2H2 type domain profile.	IPR013087	Zinc finger C2H2-type	GO:0003676
FtPinG0006999300.01.T01	Gene3D	G3DSA:3.30.160.60
FtPinG0007534500.01.T01	Coils	Coil
FtPinG0007534500.01.T01	Pfam	PF16760	Starch/carbohydrate-binding module (family 53)	IPR005085	Carbohydrate binding module family 25	GO:2001070
FtPinG0007534500.01.T01	MobiDBLite	mobidb-lite	consensus disorder prediction
FtPinG0007534500.01.T01	MobiDBLite	mobidb-lite	consensus disorder prediction
FtPinG0006132400.01.T01	Gene3D	G3DSA:1.10.630.10		IPR036396	Cytochrome P450 superfamily	GO:0005506|GO:0016705|GO:0020037|GO:0055114
FtPinG0006132400.01.T01	PRINTS	PR00463	E-class P450 group I signature	IPR002401	Cytochrome P450, E-class, group I	GO:0005506|GO:0016705|GO:0020037|GO:0055114
FtPinG0006132400.01.T01	PRINTS	PR00463	E-class P450 group I signature	IPR002401	Cytochrome P450, E-class, group I	GO:0005506|GO:0016705|GO:0020037|GO:0055114
FtPinG0006132400.01.T01	PRINTS	PR00463	E-class P450 group I signature	IPR002401	Cytochrome P450, E-class, group I	GO:0005506|GO:0016705|GO:0020037|GO:0055114
FtPinG0006132400.01.T01	PRINTS	PR00463	E-class P450 group I signature	IPR002401	Cytochrome P450, E-class, group I	GO:0005506|GO:0016705|GO:0020037|GO:0055114
FtPinG0006132400.01.T01	PRINTS	PR00463	E-class P450 group I signature	IPR002401	Cytochrome P450, E-class, group I	GO:0005506|GO:0016705|GO:0020037|GO:0055114
FtPinG0006132400.01.T01	PRINTS	PR00463	E-class P450 group I signature	IPR002401	Cytochrome P450, E-class, group I	GO:0005506|GO:0016705|GO:0020037|GO:0055114
FtPinG0006132400.01.T01	PRINTS	PR00463	E-class P450 group I signature	IPR002401	Cytochrome P450, E-class, group I	GO:0005506|GO:0016705|GO:0020037|GO:0055114
FtPinG0006132400.01.T01	SUPERFAMILY	SSF48264		IPR036396	Cytochrome P450 superfamily	GO:0005506|GO:0016705|GO:0020037|GO:0055114
FtPinG0006132400.01.T01	PRINTS	PR00385	P450 superfamily signature	IPR001128	Cytochrome P450	GO:0005506|GO:0016705|GO:0020037|GO:0055114
FtPinG0006132400.01.T01	PRINTS	PR00385	P450 superfamily signature	IPR001128	Cytochrome P450	GO:0005506|GO:0016705|GO:0020037|GO:0055114
FtPinG0006132400.01.T01	PRINTS	PR00385	P450 superfamily signature	IPR001128	Cytochrome P450	GO:0005506|GO:0016705|GO:0020037|GO:0055114
FtPinG0006132400.01.T01	PRINTS	PR00385	P450 superfamily signature	IPR001128	Cytochrome P450	GO:0005506|GO:0016705|GO:0020037|GO:0055114
FtPinG0006132400.01.T01	Pfam	PF00067	Cytochrome P450	IPR001128	Cytochrome P450	GO:0005506|GO:0016705|GO:0020037|GO:0055114
FtPinG0006132400.01.T01	ProSitePatterns	PS00086	Cytochrome P450 cysteine heme-iron ligand signature.	IPR017972	Cytochrome P450, conserved site	GO:0016705|GO:0055114
FtPinG0006161800.01.T01	SUPERFAMILY	SSF50249		IPR012340	Nucleic acid-binding, OB-fold
FtPinG0006324200.01.T01	ProDom	PD002389	RIBOSOMAL RRNA-BINDING RNA-BINDING RIBONUCLEOPROTEIN L20 50S L20 CHLOROPLAST BACTERIAL ORGANELLE
FtPinG0006324200.01.T01	Gene3D	G3DSA:1.10.1900.20		IPR035566	Ribosomal protein L20, C-terminal		Reactome: R-HSA-5368286|Reactome: R-HSA-5389840|Reactome: R-HSA-5419276
FtPinG0006324200.01.T01	ProSitePatterns	PS00937	Ribosomal protein L20 signature.	IPR005813	Ribosomal protein L20	GO:0003735|GO:0005622|GO:0005840|GO:0006412|GO:0019843	Reactome: R-HSA-5368286|Reactome: R-HSA-5389840|Reactome: R-HSA-5419276
FtPinG0006324200.01.T01	SUPERFAMILY	SSF74731		IPR035566	Ribosomal protein L20, C-terminal		Reactome: R-HSA-5368286|Reactome: R-HSA-5389840|Reactome: R-HSA-5419276
FtPinG0006324200.01.T01	CDD	cd07026	Ribosomal_L20	IPR005813	Ribosomal protein L20	GO:0003735|GO:0005622|GO:0005840|GO:0006412|GO:0019843	Reactome: R-HSA-5368286|Reactome: R-HSA-5389840|Reactome: R-HSA-5419276
FtPinG0006324200.01.T01	TIGRFAM	TIGR01032	rplT_bact: ribosomal protein bL20	IPR005813	Ribosomal protein L20	GO:0003735|GO:0005622|GO:0005840|GO:0006412|GO:0019843	Reactome: R-HSA-5368286|Reactome: R-HSA-5389840|Reactome: R-HSA-5419276
FtPinG0006324200.01.T01	Pfam	PF00453	Ribosomal protein L20	IPR005813	Ribosomal protein L20	GO:0003735|GO:0005622|GO:0005840|GO:0006412|GO:0019843	Reactome: R-HSA-5368286|Reactome: R-HSA-5389840|Reactome: R-HSA-5419276
FtPinG0007147100.01.T01	MobiDBLite	mobidb-lite	consensus disorder prediction
FtPinG0007147100.01.T01	MobiDBLite	mobidb-lite	consensus disorder prediction
FtPinG0007083500.01.T01	ProSiteProfiles	PS50157	Zinc finger C2H2 type domain profile.	IPR013087	Zinc finger C2H2-type	GO:0003676
FtPinG0007083500.01.T01	MobiDBLite	mobidb-lite	consensus disorder prediction
FtPinG0007083500.01.T01	Gene3D	G3DSA:3.30.160.60
FtPinG0007083500.01.T01	MobiDBLite	mobidb-lite	consensus disorder prediction
FtPinG0007083500.01.T01	MobiDBLite	mobidb-lite	consensus disorder prediction
FtPinG0007083500.01.T01	SUPERFAMILY	SSF57667		IPR036236	Zinc finger C2H2 superfamily
FtPinG0007083500.01.T01	ProSitePatterns	PS00028	Zinc finger C2H2 type domain signature.	IPR013087	Zinc finger C2H2-type	GO:0003676
FtPinG0007147500.01.T01	Pfam	PF08417	Pheophorbide a oxygenase	IPR013626	Pheophorbide a oxygenase	GO:0010277|GO:0055114
FtPinG0007147500.01.T01	SUPERFAMILY	SSF55961
FtPinG0004496500.01.T01	MobiDBLite	mobidb-lite	consensus disorder prediction
FtPinG0004496500.01.T01	MobiDBLite	mobidb-lite	consensus disorder prediction
FtPinG0004496500.01.T01	Pfam	PF05678	VQ motif	IPR008889	VQ
FtPinG0008631700.01.T01	CDD	cd08958	FR_SDR_e
FtPinG0008631700.01.T01	Pfam	PF01073	3-beta hydroxysteroid dehydrogenase/isomerase family	IPR002225	3-beta hydroxysteroid dehydrogenase/isomerase	GO:0003854|GO:0006694|GO:0016616|GO:0055114
FtPinG0008631700.01.T01	Gene3D	G3DSA:3.40.50.720
FtPinG0008631700.01.T01	SUPERFAMILY	SSF51735		IPR036291	NAD(P)-binding domain superfamily
FtPinG0005601600.01.T01	MobiDBLite	mobidb-lite	consensus disorder prediction
FtPinG0005601600.01.T01	MobiDBLite	mobidb-lite	consensus disorder prediction
FtPinG0005842700.01.T01	MobiDBLite	mobidb-lite	consensus disorder prediction
FtPinG0005842700.01.T01	SMART	SM00428		IPR000164	Histone H3/CENP-A	GO:0000786|GO:0003677
FtPinG0005842700.01.T01	PRINTS	PR00622	Histone H3 signature	IPR000164	Histone H3/CENP-A	GO:0000786|GO:0003677
FtPinG0005842700.01.T01	PRINTS	PR00622	Histone H3 signature	IPR000164	Histone H3/CENP-A	GO:0000786|GO:0003677
FtPinG0005842700.01.T01	PRINTS	PR00622	Histone H3 signature	IPR000164	Histone H3/CENP-A	GO:0000786|GO:0003677
FtPinG0005842700.01.T01	PRINTS	PR00622	Histone H3 signature	IPR000164	Histone H3/CENP-A	GO:0000786|GO:0003677
FtPinG0005842700.01.T01	PRINTS	PR00622	Histone H3 signature	IPR000164	Histone H3/CENP-A	GO:0000786|GO:0003677
FtPinG0005842700.01.T01	PRINTS	PR00622	Histone H3 signature	IPR000164	Histone H3/CENP-A	GO:0000786|GO:0003677
FtPinG0005842700.01.T01	PRINTS	PR00622	Histone H3 signature	IPR000164	Histone H3/CENP-A	GO:0000786|GO:0003677
FtPinG0005842700.01.T01	SUPERFAMILY	SSF47113		IPR009072	Histone-fold	GO:0046982
FtPinG0005842700.01.T01	Gene3D	G3DSA:1.10.20.10		IPR009072	Histone-fold	GO:0046982
FtPinG0005842700.01.T01	Pfam	PF00125	Core histone H2A/H2B/H3/H4	IPR007125	Histone H2A/H2B/H3	GO:0003677
FtPinG0005842700.01.T01	ProSitePatterns	PS00959	Histone H3 signature 2.	IPR000164	Histone H3/CENP-A	GO:0000786|GO:0003677
FtPinG0006636600.01.T01	Pfam	PF07714	Protein tyrosine kinase	IPR001245	Serine-threonine/tyrosine-protein kinase, catalytic domain	GO:0004672|GO:0006468
FtPinG0006636600.01.T01	ProSiteProfiles	PS50026	EGF-like domain profile.	IPR000742	EGF-like domain
FtPinG0006636600.01.T01	Pfam	PF01453	D-mannose binding lectin	IPR001480	Bulb-type lectin domain
FtPinG0006636600.01.T01	SUPERFAMILY	SSF56112		IPR011009	Protein kinase-like domain superfamily
FtPinG0006636600.01.T01	ProSiteProfiles	PS50011	Protein kinase domain profile.	IPR000719	Protein kinase domain	GO:0004672|GO:0005524|GO:0006468
FtPinG0006636600.01.T01	SMART	SM00220		IPR000719	Protein kinase domain	GO:0004672|GO:0005524|GO:0006468
FtPinG0006636600.01.T01	ProSiteProfiles	PS50948	PAN/Apple domain profile.	IPR003609	PAN/Apple domain
FtPinG0006636600.01.T01	Pfam	PF11883	Domain of unknown function (DUF3403)	IPR021820	S-locus receptor kinase, C-terminal	GO:0004674	KEGG: 04150+2.7.11.1|KEGG: 04151+2.7.11.1|KEGG: 04714+2.7.11.1|KEGG: 04926+2.7.11.1|KEGG: 05165+2.7.11.1
FtPinG0006636600.01.T01	ProSitePatterns	PS00108	Serine/Threonine protein kinases active-site signature.	IPR008271	Serine/threonine-protein kinase, active site	GO:0004672|GO:0006468
FtPinG0006636600.01.T01	Gene3D	G3DSA:3.30.200.20
FtPinG0006636600.01.T01	Gene3D	G3DSA:1.10.510.10
FtPinG0006636600.01.T01	Pfam	PF12398	Receptor serine/threonine kinase	IPR022126	S-locus, receptor kinase	GO:0004674	KEGG: 04150+2.7.11.1|KEGG: 04151+2.7.11.1|KEGG: 04714+2.7.11.1|KEGG: 04926+2.7.11.1|KEGG: 05165+2.7.11.1
FtPinG0006636600.01.T01	Pfam	PF08276	PAN-like domain	IPR003609	PAN/Apple domain
FtPinG0006636600.01.T01	PIRSF	PIRSF000641		IPR024171	S-receptor-like serine/threonine-protein kinase	GO:0004674	KEGG: 04150+2.7.11.1|KEGG: 04151+2.7.11.1|KEGG: 04714+2.7.11.1|KEGG: 04926+2.7.11.1|KEGG: 05165+2.7.11.1
FtPinG0006636600.01.T01	CDD	cd01098	PAN_AP_plant
FtPinG0006636600.01.T01	SUPERFAMILY	SSF51110		IPR036426	Bulb-type lectin domain superfamily
FtPinG0006636600.01.T01	CDD	cd14066	STKc_IRAK
FtPinG0006636600.01.T01	ProSitePatterns	PS00107	Protein kinases ATP-binding region signature.	IPR017441	Protein kinase, ATP binding site	GO:0005524
FtPinG0006636600.01.T01	SMART	SM00473		IPR003609	PAN/Apple domain
FtPinG0006636600.01.T01	Pfam	PF00954	S-locus glycoprotein domain	IPR000858	S-locus glycoprotein domain	GO:0048544	KEGG: 04150+2.7.11.1|KEGG: 04151+2.7.11.1|KEGG: 04714+2.7.11.1|KEGG: 04926+2.7.11.1|KEGG: 05165+2.7.11.1
FtPinG0006362500.01.T01	PIRSF	PIRSF001413		IPR023026	Tryptophan synthase beta chain/beta chain-like	GO:0000162|GO:0004834	KEGG: 00260+4.2.1.20|KEGG: 00400+4.2.1.20
FtPinG0006362500.01.T01	ProSitePatterns	PS00168	Tryptophan synthase beta chain pyridoxal-phosphate attachment site.	IPR006653	Tryptophan synthase, beta chain, conserved site	GO:0004834|GO:0006568	KEGG: 00260+4.2.1.20|KEGG: 00400+4.2.1.20
FtPinG0006362500.01.T01	Pfam	PF00291	Pyridoxal-phosphate dependent enzyme	IPR001926	Pyridoxal-phosphate dependent enzyme
FtPinG0006362500.01.T01	SUPERFAMILY	SSF53686		IPR036052	Tryptophan synthase beta subunit-like PLP-dependent enzyme
FtPinG0006362500.01.T01	Gene3D	G3DSA:3.40.50.1100
FtPinG0006362500.01.T01	Gene3D	G3DSA:3.40.50.1100
FtPinG0006362500.01.T01	Gene3D	G3DSA:3.40.50.1100
FtPinG0006362500.01.T01	MobiDBLite	mobidb-lite	consensus disorder prediction
FtPinG0008711500.01.T01	SUPERFAMILY	SSF56672
FtPinG0008711500.01.T01	Gene3D	G3DSA:3.10.20.370
FtPinG0008711500.01.T01	Gene3D	G3DSA:3.30.70.270
FtPinG0008711500.01.T01	CDD	cd09274	RNase_HI_RT_Ty3
FtPinG0006163600.01.T01	Pfam	PF01963	TraB family	IPR002816	Pheromone shutdown, TraB
FtPinG0006043600.01.T01	MobiDBLite	mobidb-lite	consensus disorder prediction
FtPinG0006043600.01.T01	Pfam	PF14223	gag-polypeptide of LTR copia-type
FtPinG0005355700.01.T01	PRINTS	PR00081	Glucose/ribitol dehydrogenase family signature	IPR002347	Short-chain dehydrogenase/reductase SDR
FtPinG0005355700.01.T01	PRINTS	PR00081	Glucose/ribitol dehydrogenase family signature	IPR002347	Short-chain dehydrogenase/reductase SDR
FtPinG0005355700.01.T01	PRINTS	PR00081	Glucose/ribitol dehydrogenase family signature	IPR002347	Short-chain dehydrogenase/reductase SDR
FtPinG0005355700.01.T01	PRINTS	PR00081	Glucose/ribitol dehydrogenase family signature	IPR002347	Short-chain dehydrogenase/reductase SDR
FtPinG0005355700.01.T01	PRINTS	PR00081	Glucose/ribitol dehydrogenase family signature	IPR002347	Short-chain dehydrogenase/reductase SDR
FtPinG0005355700.01.T01	Pfam	PF00106	short chain dehydrogenase	IPR002347	Short-chain dehydrogenase/reductase SDR
FtPinG0005355700.01.T01	Gene3D	G3DSA:3.40.50.720
FtPinG0005355700.01.T01	SUPERFAMILY	SSF51735		IPR036291	NAD(P)-binding domain superfamily
FtPinG0005355700.01.T01	CDD	cd05327	retinol-DH_like_SDR_c_like
FtPinG0003508600.01.T01	Pfam	PF05641	Agenet domain	IPR008395	Agenet-like domain
FtPinG0003508600.01.T01	SMART	SM00743		IPR014002	Agenet domain, plant type
FtPinG0003508600.01.T01	SMART	SM00743		IPR014002	Agenet domain, plant type
FtPinG0005685100.01.T01	Pfam	PF00155	Aminotransferase class I and II	IPR004839	Aminotransferase, class I/classII	GO:0009058|GO:0030170
FtPinG0005685100.01.T01	TIGRFAM	TIGR01265	tyr_nico_aTase: tyrosine/nicotianamine family aminotransferase	IPR005958	Tyrosine/nicotianamine aminotransferase	GO:0006520|GO:0008483|GO:0030170	Reactome: R-HSA-71182
FtPinG0005685100.01.T01	CDD	cd00609	AAT_like
FtPinG0005685100.01.T01	PIRSF	PIRSF000517		IPR005958	Tyrosine/nicotianamine aminotransferase	GO:0006520|GO:0008483|GO:0030170	Reactome: R-HSA-71182
FtPinG0005685100.01.T01	SUPERFAMILY	SSF53383		IPR015424	Pyridoxal phosphate-dependent transferase
FtPinG0005685100.01.T01	Gene3D	G3DSA:3.40.640.10		IPR015421	Pyridoxal phosphate-dependent transferase, major domain	GO:0003824
FtPinG0005685100.01.T01	Gene3D	G3DSA:3.90.1150.10		IPR015422	Pyridoxal phosphate-dependent transferase domain 1	GO:0003824
FtPinG0005685100.01.T01	Gene3D	G3DSA:3.90.1150.10		IPR015422	Pyridoxal phosphate-dependent transferase domain 1	GO:0003824
FtPinG0007147800.01.T01	PRINTS	PR00111	Alpha/beta hydrolase fold signature	IPR000073	Alpha/beta hydrolase fold-1
FtPinG0007147800.01.T01	PRINTS	PR00111	Alpha/beta hydrolase fold signature	IPR000073	Alpha/beta hydrolase fold-1
FtPinG0007147800.01.T01	PRINTS	PR00111	Alpha/beta hydrolase fold signature	IPR000073	Alpha/beta hydrolase fold-1
FtPinG0007147800.01.T01	Gene3D	G3DSA:3.40.50.1820		IPR029058	Alpha/Beta hydrolase fold
FtPinG0007147800.01.T01	SUPERFAMILY	SSF53474		IPR029058	Alpha/Beta hydrolase fold
FtPinG0007147800.01.T01	Pfam	PF12697	Alpha/beta hydrolase family	IPR000073	Alpha/beta hydrolase fold-1
FtPinG0005842300.01.T01	MobiDBLite	mobidb-lite	consensus disorder prediction
FtPinG0005842300.01.T01	SUPERFAMILY	SSF47113		IPR009072	Histone-fold	GO:0046982
FtPinG0005842300.01.T01	Gene3D	G3DSA:1.10.20.10		IPR009072	Histone-fold	GO:0046982
FtPinG0005842300.01.T01	ProSitePatterns	PS00959	Histone H3 signature 2.	IPR000164	Histone H3/CENP-A	GO:0000786|GO:0003677
FtPinG0005842300.01.T01	Pfam	PF00125	Core histone H2A/H2B/H3/H4	IPR007125	Histone H2A/H2B/H3	GO:0003677
FtPinG0005842300.01.T01	SMART	SM00428		IPR000164	Histone H3/CENP-A	GO:0000786|GO:0003677
FtPinG0005842300.01.T01	PRINTS	PR00622	Histone H3 signature	IPR000164	Histone H3/CENP-A	GO:0000786|GO:0003677
FtPinG0005842300.01.T01	PRINTS	PR00622	Histone H3 signature	IPR000164	Histone H3/CENP-A	GO:0000786|GO:0003677
FtPinG0005842300.01.T01	PRINTS	PR00622	Histone H3 signature	IPR000164	Histone H3/CENP-A	GO:0000786|GO:0003677
FtPinG0005842300.01.T01	PRINTS	PR00622	Histone H3 signature	IPR000164	Histone H3/CENP-A	GO:0000786|GO:0003677
FtPinG0005842300.01.T01	PRINTS	PR00622	Histone H3 signature	IPR000164	Histone H3/CENP-A	GO:0000786|GO:0003677
FtPinG0005842300.01.T01	PRINTS	PR00622	Histone H3 signature	IPR000164	Histone H3/CENP-A	GO:0000786|GO:0003677
FtPinG0005842300.01.T01	PRINTS	PR00622	Histone H3 signature	IPR000164	Histone H3/CENP-A	GO:0000786|GO:0003677
FtPinG0006999000.01.T01	Gene3D	G3DSA:4.10.280.10		IPR036638	Helix-loop-helix DNA-binding domain superfamily	GO:0046983
FtPinG0006999000.01.T01	MobiDBLite	mobidb-lite	consensus disorder prediction
FtPinG0006999000.01.T01	Pfam	PF00010	Helix-loop-helix DNA-binding domain	IPR011598	Myc-type, basic helix-loop-helix (bHLH) domain	GO:0046983
FtPinG0006999000.01.T01	ProSiteProfiles	PS50888	Myc-type, basic helix-loop-helix (bHLH) domain profile.	IPR011598	Myc-type, basic helix-loop-helix (bHLH) domain	GO:0046983
FtPinG0006999000.01.T01	CDD	cd00083	HLH	IPR011598	Myc-type, basic helix-loop-helix (bHLH) domain	GO:0046983
FtPinG0006999000.01.T01	SUPERFAMILY	SSF47459		IPR036638	Helix-loop-helix DNA-binding domain superfamily	GO:0046983
FtPinG0006999000.01.T01	SMART	SM00353		IPR011598	Myc-type, basic helix-loop-helix (bHLH) domain	GO:0046983
FtPinG0006164000.01.T01	ProSiteProfiles	PS50865	Zinc finger MYND-type profile.	IPR002893	Zinc finger, MYND-type
FtPinG0006164000.01.T01	SUPERFAMILY	SSF144232
FtPinG0004866200.01.T01	Gene3D	G3DSA:3.40.30.10
FtPinG0007906400.01.T01	Pfam	PF00361	Proton-conducting membrane transporter	IPR001750	NADH:quinone oxidoreductase/Mrp antiporter, membrane subunit		Reactome: R-HSA-611105|Reactome: R-HSA-6799198
FtPinG0004496700.01.T01	MobiDBLite	mobidb-lite	consensus disorder prediction
FtPinG0004496700.01.T01	MobiDBLite	mobidb-lite	consensus disorder prediction
FtPinG0004496700.01.T01	MobiDBLite	mobidb-lite	consensus disorder prediction
FtPinG0004496700.01.T01	Coils	Coil
FtPinG0004496700.01.T01	Pfam	PF06886	Targeting protein for Xklp2 (TPX2)	IPR027329	TPX2, C-terminal		Reactome: R-HSA-6804756|Reactome: R-HSA-8854518
FtPinG0003507700.01.T01	CDD	cd16495	RING_CH-C4HC3_MARCH
FtPinG0003507700.01.T01	SMART	SM00744		IPR011016	Zinc finger, RING-CH-type	GO:0008270	MetaCyc: PWY-7511
FtPinG0003507700.01.T01	MobiDBLite	mobidb-lite	consensus disorder prediction
FtPinG0003507700.01.T01	ProSiteProfiles	PS51292	Zinc finger RING-CH-type profile.	IPR011016	Zinc finger, RING-CH-type	GO:0008270	MetaCyc: PWY-7511
FtPinG0003507700.01.T01	SUPERFAMILY	SSF57850
FtPinG0003507700.01.T01	Gene3D	G3DSA:3.30.40.10		IPR013083	Zinc finger, RING/FYVE/PHD-type
FtPinG0003507700.01.T01	Pfam	PF12906	RING-variant domain	IPR011016	Zinc finger, RING-CH-type	GO:0008270	MetaCyc: PWY-7511
FtPinG0006706600.01.T01	Pfam	PF05996	Ferredoxin-dependent bilin reductase	IPR009249	Ferredoxin-dependent bilin reductase	GO:0010024|GO:0016636|GO:0050897|GO:0055114
FtPinG0006706600.01.T01	Gene3D	G3DSA:3.40.1500.20
FtPinG0008631900.01.T01	Pfam	PF06423	GWT1	IPR009447	GWT1	GO:0006506|GO:0016021|GO:0016746	Reactome: R-HSA-162710
FtPinG0008631900.01.T01	PIRSF	PIRSF017321		IPR009447	GWT1	GO:0006506|GO:0016021|GO:0016746	Reactome: R-HSA-162710
FtPinG0004496700.01.T02	Pfam	PF06886	Targeting protein for Xklp2 (TPX2)	IPR027329	TPX2, C-terminal		Reactome: R-HSA-6804756|Reactome: R-HSA-8854518
FtPinG0004496700.01.T02	MobiDBLite	mobidb-lite	consensus disorder prediction
FtPinG0004496700.01.T02	MobiDBLite	mobidb-lite	consensus disorder prediction
FtPinG0004496700.01.T02	Coils	Coil
FtPinG0004496700.01.T02	MobiDBLite	mobidb-lite	consensus disorder prediction
FtPinG0001538800.01.T01	Pfam	PF00642	Zinc finger C-x8-C-x5-C-x3-H type (and similar)	IPR000571	Zinc finger, CCCH-type	GO:0046872
FtPinG0001538800.01.T01	Gene3D	G3DSA:4.10.1000.10
FtPinG0001538800.01.T01	CDD	cd12458	RRM_AtC3H46_like	IPR034365	AtC3H46-like, RNA recognition motif
FtPinG0001538800.01.T01	Pfam	PF00076	RNA recognition motif. (a.k.a. RRM, RBD, or RNP domain)	IPR000504	RNA recognition motif domain	GO:0003676
FtPinG0001538800.01.T01	SUPERFAMILY	SSF54928		IPR035979	RNA-binding domain superfamily	GO:0003676
FtPinG0001538800.01.T01	MobiDBLite	mobidb-lite	consensus disorder prediction
FtPinG0001538800.01.T01	SUPERFAMILY	SSF90229		IPR036855	Zinc finger, CCCH-type superfamily	GO:0046872
FtPinG0001538800.01.T01	MobiDBLite	mobidb-lite	consensus disorder prediction
FtPinG0001538800.01.T01	MobiDBLite	mobidb-lite	consensus disorder prediction
FtPinG0001538800.01.T01	SMART	SM00360		IPR000504	RNA recognition motif domain	GO:0003676
FtPinG0001538800.01.T01	ProSiteProfiles	PS50103	Zinc finger C3H1-type profile.	IPR000571	Zinc finger, CCCH-type	GO:0046872
FtPinG0001538800.01.T01	ProSiteProfiles	PS50102	Eukaryotic RNA Recognition Motif (RRM) profile.	IPR000504	RNA recognition motif domain	GO:0003676
FtPinG0001538800.01.T01	MobiDBLite	mobidb-lite	consensus disorder prediction
FtPinG0001538800.01.T01	Gene3D	G3DSA:3.30.70.330		IPR012677	Nucleotide-binding alpha-beta plait domain superfamily
FtPinG0001538800.01.T01	SMART	SM00356		IPR000571	Zinc finger, CCCH-type	GO:0046872
FtPinG0006496100.01.T01	ProSitePatterns	PS00108	Serine/Threonine protein kinases active-site signature.	IPR008271	Serine/threonine-protein kinase, active site	GO:0004672|GO:0006468
FtPinG0006496100.01.T01	ProSiteProfiles	PS51473	Gnk2-homologous domain profile.	IPR002902	Gnk2-homologous domain
FtPinG0006496100.01.T01	ProSitePatterns	PS00107	Protein kinases ATP-binding region signature.	IPR017441	Protein kinase, ATP binding site	GO:0005524
FtPinG0006496100.01.T01	CDD	cd14066	STKc_IRAK
FtPinG0006496100.01.T01	ProSiteProfiles	PS51473	Gnk2-homologous domain profile.	IPR002902	Gnk2-homologous domain
FtPinG0006496100.01.T01	SUPERFAMILY	SSF56112		IPR011009	Protein kinase-like domain superfamily
FtPinG0006496100.01.T01	Gene3D	G3DSA:3.30.200.20
FtPinG0006496100.01.T01	SMART	SM00220		IPR000719	Protein kinase domain	GO:0004672|GO:0005524|GO:0006468
FtPinG0006496100.01.T01	Pfam	PF07714	Protein tyrosine kinase	IPR001245	Serine-threonine/tyrosine-protein kinase, catalytic domain	GO:0004672|GO:0006468
FtPinG0006496100.01.T01	Gene3D	G3DSA:1.10.510.10
FtPinG0006496100.01.T01	Pfam	PF01657	Salt stress response/antifungal	IPR002902	Gnk2-homologous domain
FtPinG0006496100.01.T01	Pfam	PF01657	Salt stress response/antifungal	IPR002902	Gnk2-homologous domain
FtPinG0006496100.01.T01	Gene3D	G3DSA:3.30.430.20		IPR038408	Gnk2-homologous domain superfamily
FtPinG0006496100.01.T01	Gene3D	G3DSA:3.30.430.20		IPR038408	Gnk2-homologous domain superfamily
FtPinG0006496100.01.T01	ProSiteProfiles	PS50011	Protein kinase domain profile.	IPR000719	Protein kinase domain	GO:0004672|GO:0005524|GO:0006468
FtPinG0006496100.01.T03	SMART	SM00220		IPR000719	Protein kinase domain	GO:0004672|GO:0005524|GO:0006468
FtPinG0006496100.01.T03	Gene3D	G3DSA:1.10.510.10
FtPinG0006496100.01.T03	ProSiteProfiles	PS50011	Protein kinase domain profile.	IPR000719	Protein kinase domain	GO:0004672|GO:0005524|GO:0006468
FtPinG0006496100.01.T03	Gene3D	G3DSA:3.30.200.20
FtPinG0006496100.01.T03	Pfam	PF00069	Protein kinase domain	IPR000719	Protein kinase domain	GO:0004672|GO:0005524|GO:0006468
FtPinG0006496100.01.T03	SUPERFAMILY	SSF56112		IPR011009	Protein kinase-like domain superfamily
FtPinG0006496100.01.T03	ProSitePatterns	PS00108	Serine/Threonine protein kinases active-site signature.	IPR008271	Serine/threonine-protein kinase, active site	GO:0004672|GO:0006468
FtPinG0006496100.01.T03	MobiDBLite	mobidb-lite	consensus disorder prediction
FtPinG0006496100.01.T03	ProSitePatterns	PS00107	Protein kinases ATP-binding region signature.	IPR017441	Protein kinase, ATP binding site	GO:0005524
FtPinG0006496100.01.T02	ProSiteProfiles	PS51473	Gnk2-homologous domain profile.	IPR002902	Gnk2-homologous domain
FtPinG0006496100.01.T02	ProSitePatterns	PS00107	Protein kinases ATP-binding region signature.	IPR017441	Protein kinase, ATP binding site	GO:0005524
FtPinG0006496100.01.T02	ProSiteProfiles	PS51473	Gnk2-homologous domain profile.	IPR002902	Gnk2-homologous domain
FtPinG0006496100.01.T02	SUPERFAMILY	SSF56112		IPR011009	Protein kinase-like domain superfamily
FtPinG0006496100.01.T02	Gene3D	G3DSA:3.30.430.20		IPR038408	Gnk2-homologous domain superfamily
FtPinG0006496100.01.T02	Gene3D	G3DSA:3.30.430.20		IPR038408	Gnk2-homologous domain superfamily
FtPinG0006496100.01.T02	ProSiteProfiles	PS50011	Protein kinase domain profile.	IPR000719	Protein kinase domain	GO:0004672|GO:0005524|GO:0006468
FtPinG0006496100.01.T02	Pfam	PF01657	Salt stress response/antifungal	IPR002902	Gnk2-homologous domain
FtPinG0006496100.01.T02	Pfam	PF01657	Salt stress response/antifungal	IPR002902	Gnk2-homologous domain
FtPinG0006496100.01.T02	Pfam	PF07714	Protein tyrosine kinase	IPR001245	Serine-threonine/tyrosine-protein kinase, catalytic domain	GO:0004672|GO:0006468
FtPinG0006496100.01.T02	Gene3D	G3DSA:3.30.200.20
FtPinG0007196400.01.T01	Gene3D	G3DSA:1.10.3090.10
FtPinG0007196400.01.T01	Gene3D	G3DSA:3.30.460.10
FtPinG0007196400.01.T01	CDD	cd05398	NT_ClassII-CCAase	IPR002646	Poly A polymerase, head domain	GO:0003723|GO:0006396|GO:0016779	Reactome: R-HSA-6784531|Reactome: R-HSA-6785470
FtPinG0007196400.01.T01	SUPERFAMILY	SSF81891
FtPinG0007196400.01.T01	Pfam	PF01743	Poly A polymerase head domain	IPR002646	Poly A polymerase, head domain	GO:0003723|GO:0006396|GO:0016779	Reactome: R-HSA-6784531|Reactome: R-HSA-6785470
FtPinG0007196400.01.T01	MobiDBLite	mobidb-lite	consensus disorder prediction
FtPinG0007196400.01.T01	SUPERFAMILY	SSF81301
FtPinG0007196400.01.T01	Pfam	PF12627	Probable RNA and SrmB- binding site of polymerase A	IPR032828	tRNA nucleotidyltransferase/poly(A) polymerase, RNA and SrmB- binding domain		Reactome: R-HSA-6784531|Reactome: R-HSA-6785470
FtPinG0003492100.01.T01	Pfam	PF05879	Root hair defective 3 GTP-binding protein (RHD3)	IPR008803	RHD3/Sey1
FtPinG0004866000.01.T01	Pfam	PF05623	Protein of unknown function (DUF789)	IPR008507	Protein of unknown function DUF789
FtPinG0004866000.01.T01	MobiDBLite	mobidb-lite	consensus disorder prediction
FtPinG0004866000.01.T01	MobiDBLite	mobidb-lite	consensus disorder prediction
FtPinG0004866000.01.T01	MobiDBLite	mobidb-lite	consensus disorder prediction
FtPinG0004865400.01.T01	SMART	SM00724		IPR006634	TRAM/LAG1/CLN8 homology domain	GO:0016021
FtPinG0004865400.01.T01	ProSiteProfiles	PS50922	TLC domain profile.	IPR006634	TRAM/LAG1/CLN8 homology domain	GO:0016021
FtPinG0004865400.01.T01	Pfam	PF03798	TLC domain	IPR006634	TRAM/LAG1/CLN8 homology domain	GO:0016021
FtPinG0007534800.01.T01	Pfam	PF01398	JAB1/Mov34/MPN/PAD-1 ubiquitin protease	IPR000555	JAB1/MPN/MOV34 metalloenzyme domain	GO:0005515
FtPinG0007534800.01.T01	SUPERFAMILY	SSF102712
FtPinG0007534800.01.T01	Gene3D	G3DSA:1.20.58.280
FtPinG0007534800.01.T01	Pfam	PF08969	USP8 dimerisation domain	IPR015063	USP8 dimerisation domain
FtPinG0007534800.01.T01	ProSiteProfiles	PS50249	MPN domain profile.	IPR037518	MPN domain
FtPinG0007534800.01.T01	CDD	cd08066	MPN_AMSH_like
FtPinG0007534800.01.T01	SMART	SM00232		IPR000555	JAB1/MPN/MOV34 metalloenzyme domain	GO:0005515
FtPinG0007534800.01.T01	Coils	Coil
FtPinG0007534800.01.T01	Gene3D	G3DSA:3.40.140.10
FtPinG0007534800.01.T01	MobiDBLite	mobidb-lite	consensus disorder prediction
FtPinG0003507500.01.T01	Gene3D	G3DSA:3.80.10.10		IPR032675	Leucine-rich repeat domain superfamily
FtPinG0003507500.01.T01	SUPERFAMILY	SSF52058
FtPinG0003507500.01.T01	SUPERFAMILY	SSF52058
FtPinG0003507500.01.T01	Gene3D	G3DSA:3.80.10.10		IPR032675	Leucine-rich repeat domain superfamily
FtPinG0003507500.01.T01	Coils	Coil
FtPinG0007535200.01.T01	MobiDBLite	mobidb-lite	consensus disorder prediction
FtPinG0007146900.01.T01	SUPERFAMILY	SSF81606		IPR036457	PPM-type phosphatase domain superfamily		KEGG: 04658+3.1.3.16|KEGG: 04660+3.1.3.16
FtPinG0007146900.01.T01	Gene3D	G3DSA:3.60.40.10		IPR036457	PPM-type phosphatase domain superfamily		KEGG: 04658+3.1.3.16|KEGG: 04660+3.1.3.16
FtPinG0007146900.01.T01	ProSitePatterns	PS01032	PPM-type phosphatase domain signature.	IPR000222	PPM-type phosphatase, divalent cation binding	GO:0043169	KEGG: 04658+3.1.3.16|KEGG: 04660+3.1.3.16
FtPinG0003509500.01.T01	SUPERFAMILY	SSF56672
FtPinG0003509500.01.T01	Pfam	PF07727	Reverse transcriptase (RNA-dependent DNA polymerase)	IPR013103	Reverse transcriptase, RNA-dependent DNA polymerase		KEGG: 00230+2.7.7.7|KEGG: 00240+2.7.7.7
FtPinG0003509500.01.T01	Pfam	PF00665	Integrase core domain	IPR001584	Integrase, catalytic core	GO:0015074
FtPinG0003509500.01.T01	ProSiteProfiles	PS50994	Integrase catalytic domain profile.	IPR001584	Integrase, catalytic core	GO:0015074
FtPinG0003509500.01.T01	Gene3D	G3DSA:3.30.420.10		IPR036397	Ribonuclease H superfamily	GO:0003676
FtPinG0003509500.01.T01	SUPERFAMILY	SSF53098		IPR012337	Ribonuclease H-like superfamily
FtPinG0006103100.01.T01	CDD	cd08996	GH32_B_Fructosidase
FtPinG0006103100.01.T01	Pfam	PF08244	Glycosyl hydrolases family 32 C terminal	IPR013189	Glycosyl hydrolase family 32, C-terminal
FtPinG0006103100.01.T01	Pfam	PF00251	Glycosyl hydrolases family 32 N-terminal domain	IPR013148	Glycosyl hydrolase family 32, N-terminal
FtPinG0006103100.01.T01	SUPERFAMILY	SSF49899		IPR013320	Concanavalin A-like lectin/glucanase domain superfamily
FtPinG0006103100.01.T01	SUPERFAMILY	SSF49899		IPR013320	Concanavalin A-like lectin/glucanase domain superfamily
FtPinG0006103100.01.T01	SMART	SM00640		IPR001362	Glycoside hydrolase, family 32	GO:0004553|GO:0005975
FtPinG0006103100.01.T01	Gene3D	G3DSA:2.60.120.560
FtPinG0006103100.01.T01	Gene3D	G3DSA:2.115.10.20		IPR023296	Glycosyl hydrolase, five-bladed beta-propellor domain superfamily
FtPinG0006103100.01.T01	SUPERFAMILY	SSF75005		IPR023296	Glycosyl hydrolase, five-bladed beta-propellor domain superfamily
FtPinG0009843200.01.T01	SUPERFAMILY	SSF52058
FtPinG0009843200.01.T01	PRINTS	PR00019	Leucine-rich repeat signature
FtPinG0009843200.01.T01	PRINTS	PR00019	Leucine-rich repeat signature
FtPinG0009843200.01.T01	ProSiteProfiles	PS51450	Leucine-rich repeat profile.	IPR001611	Leucine-rich repeat	GO:0005515
FtPinG0009843200.01.T01	ProSiteProfiles	PS51450	Leucine-rich repeat profile.	IPR001611	Leucine-rich repeat	GO:0005515
FtPinG0009843200.01.T01	Gene3D	G3DSA:3.80.10.10		IPR032675	Leucine-rich repeat domain superfamily
FtPinG0001537000.01.T01	MobiDBLite	mobidb-lite	consensus disorder prediction
FtPinG0001537000.01.T01	MobiDBLite	mobidb-lite	consensus disorder prediction
FtPinG0001537000.01.T01	ProSitePatterns	PS00973	Ubiquitin specific protease (USP) domain signature 2.	IPR018200	Ubiquitin specific protease, conserved site	GO:0006511|GO:0036459
FtPinG0001537000.01.T01	CDD	cd02257	Peptidase_C19
FtPinG0001537000.01.T01	Pfam	PF00443	Ubiquitin carboxyl-terminal hydrolase	IPR001394	Peptidase C19, ubiquitin carboxyl-terminal hydrolase	GO:0016579|GO:0036459
FtPinG0001537000.01.T01	SUPERFAMILY	SSF54001
FtPinG0001537000.01.T01	Gene3D	G3DSA:3.90.70.10
FtPinG0001537000.01.T01	Coils	Coil
FtPinG0001537000.01.T01	ProSitePatterns	PS00972	Ubiquitin specific protease (USP) domain signature 1.	IPR018200	Ubiquitin specific protease, conserved site	GO:0006511|GO:0036459
FtPinG0001537000.01.T01	ProSiteProfiles	PS50235	Ubiquitin specific protease (USP) domain profile.	IPR028889	Ubiquitin specific protease domain
FtPinG0009546100.01.T01	Gene3D	G3DSA:3.30.70.270
FtPinG0009546100.01.T01	Pfam	PF00665	Integrase core domain	IPR001584	Integrase, catalytic core	GO:0015074
FtPinG0009546100.01.T01	Gene3D	G3DSA:1.10.340.70
FtPinG0009546100.01.T01	SUPERFAMILY	SSF56672
FtPinG0009546100.01.T01	Gene3D	G3DSA:3.30.420.10		IPR036397	Ribonuclease H superfamily	GO:0003676
FtPinG0009546100.01.T01	CDD	cd09274	RNase_HI_RT_Ty3
FtPinG0009546100.01.T01	Gene3D	G3DSA:3.10.20.370
FtPinG0009546100.01.T01	ProSiteProfiles	PS50994	Integrase catalytic domain profile.	IPR001584	Integrase, catalytic core	GO:0015074
FtPinG0009546100.01.T01	SUPERFAMILY	SSF53098		IPR012337	Ribonuclease H-like superfamily
FtPinG0007535300.01.T01	CDD	cd06257	DnaJ	IPR001623	DnaJ domain
FtPinG0007535300.01.T01	SUPERFAMILY	SSF46565		IPR036869	Chaperone J-domain superfamily
FtPinG0007535300.01.T01	MobiDBLite	mobidb-lite	consensus disorder prediction
FtPinG0007535300.01.T01	Pfam	PF00226	DnaJ domain	IPR001623	DnaJ domain
FtPinG0007535300.01.T01	ProSiteProfiles	PS50076	dnaJ domain profile.	IPR001623	DnaJ domain
FtPinG0007535300.01.T01	PRINTS	PR00625	DnaJ domain signature	IPR001623	DnaJ domain
FtPinG0007535300.01.T01	PRINTS	PR00625	DnaJ domain signature	IPR001623	DnaJ domain
FtPinG0007535300.01.T01	PRINTS	PR00625	DnaJ domain signature	IPR001623	DnaJ domain
FtPinG0007535300.01.T01	SMART	SM00271		IPR001623	DnaJ domain
FtPinG0007535300.01.T01	Gene3D	G3DSA:1.10.287.110		IPR036869	Chaperone J-domain superfamily
FtPinG0007535700.01.T01	Pfam	PF11926	Domain of unknown function (DUF3444)	IPR024593	Domain of unknown function DUF3444
FtPinG0007196900.01.T01	ProSitePatterns	PS00108	Serine/Threonine protein kinases active-site signature.	IPR008271	Serine/threonine-protein kinase, active site	GO:0004672|GO:0006468
FtPinG0007196900.01.T01	Gene3D	G3DSA:1.10.510.10
FtPinG0007196900.01.T01	Pfam	PF00069	Protein kinase domain	IPR000719	Protein kinase domain	GO:0004672|GO:0005524|GO:0006468
FtPinG0007196900.01.T01	SUPERFAMILY	SSF56112		IPR011009	Protein kinase-like domain superfamily
FtPinG0007196900.01.T01	SMART	SM00220		IPR000719	Protein kinase domain	GO:0004672|GO:0005524|GO:0006468
FtPinG0007196900.01.T01	ProSiteProfiles	PS50011	Protein kinase domain profile.	IPR000719	Protein kinase domain	GO:0004672|GO:0005524|GO:0006468
FtPinG0006637400.01.T01	Pfam	PF05512	AWPM-19-like family	IPR008390	AWPM-19-like
FtPinG0006245400.01.T01	ProSitePatterns	PS00108	Serine/Threonine protein kinases active-site signature.	IPR008271	Serine/threonine-protein kinase, active site	GO:0004672|GO:0006468
FtPinG0006245400.01.T01	ProSitePatterns	PS00107	Protein kinases ATP-binding region signature.	IPR017441	Protein kinase, ATP binding site	GO:0005524
FtPinG0006245400.01.T01	PRINTS	PR00109	Tyrosine kinase catalytic domain signature	IPR001245	Serine-threonine/tyrosine-protein kinase, catalytic domain	GO:0004672|GO:0006468
FtPinG0006245400.01.T01	PRINTS	PR00109	Tyrosine kinase catalytic domain signature	IPR001245	Serine-threonine/tyrosine-protein kinase, catalytic domain	GO:0004672|GO:0006468
FtPinG0006245400.01.T01	PRINTS	PR00109	Tyrosine kinase catalytic domain signature	IPR001245	Serine-threonine/tyrosine-protein kinase, catalytic domain	GO:0004672|GO:0006468
FtPinG0006245400.01.T01	PRINTS	PR00109	Tyrosine kinase catalytic domain signature	IPR001245	Serine-threonine/tyrosine-protein kinase, catalytic domain	GO:0004672|GO:0006468
FtPinG0006245400.01.T01	PRINTS	PR00109	Tyrosine kinase catalytic domain signature	IPR001245	Serine-threonine/tyrosine-protein kinase, catalytic domain	GO:0004672|GO:0006468
FtPinG0006245400.01.T01	MobiDBLite	mobidb-lite	consensus disorder prediction
FtPinG0006245400.01.T01	MobiDBLite	mobidb-lite	consensus disorder prediction
FtPinG0006245400.01.T01	Gene3D	G3DSA:1.10.510.10
FtPinG0006245400.01.T01	SMART	SM00220		IPR000719	Protein kinase domain	GO:0004672|GO:0005524|GO:0006468
FtPinG0006245400.01.T01	ProSiteProfiles	PS50011	Protein kinase domain profile.	IPR000719	Protein kinase domain	GO:0004672|GO:0005524|GO:0006468
FtPinG0006245400.01.T01	CDD	cd13999	STKc_MAP3K-like
FtPinG0006245400.01.T01	Gene3D	G3DSA:3.30.200.20
FtPinG0006245400.01.T01	SUPERFAMILY	SSF56112		IPR011009	Protein kinase-like domain superfamily
FtPinG0006245400.01.T01	Pfam	PF07714	Protein tyrosine kinase	IPR001245	Serine-threonine/tyrosine-protein kinase, catalytic domain	GO:0004672|GO:0006468
FtPinG0006245400.01.T01	Pfam	PF14381	Ethylene-responsive protein kinase Le-CTR1
FtPinG0001538300.01.T01	ProSiteProfiles	PS50294	Trp-Asp (WD) repeats circular profile.	IPR017986	WD40-repeat-containing domain	GO:0005515
FtPinG0001538300.01.T01	Pfam	PF08154	NLE (NUC135) domain	IPR012972	NLE
FtPinG0001538300.01.T01	SMART	SM00320		IPR001680	WD40 repeat	GO:0005515
FtPinG0001538300.01.T01	SMART	SM00320		IPR001680	WD40 repeat	GO:0005515
FtPinG0001538300.01.T01	SMART	SM00320		IPR001680	WD40 repeat	GO:0005515
FtPinG0001538300.01.T01	SMART	SM00320		IPR001680	WD40 repeat	GO:0005515
FtPinG0001538300.01.T01	SMART	SM00320		IPR001680	WD40 repeat	GO:0005515
FtPinG0001538300.01.T01	SMART	SM00320		IPR001680	WD40 repeat	GO:0005515
FtPinG0001538300.01.T01	SMART	SM00320		IPR001680	WD40 repeat	GO:0005515
FtPinG0001538300.01.T01	SMART	SM00320		IPR001680	WD40 repeat	GO:0005515
FtPinG0001538300.01.T01	ProSiteProfiles	PS50082	Trp-Asp (WD) repeats profile.	IPR001680	WD40 repeat	GO:0005515
FtPinG0001538300.01.T01	ProSiteProfiles	PS50082	Trp-Asp (WD) repeats profile.	IPR001680	WD40 repeat	GO:0005515
FtPinG0001538300.01.T01	ProSiteProfiles	PS50082	Trp-Asp (WD) repeats profile.	IPR001680	WD40 repeat	GO:0005515
FtPinG0001538300.01.T01	ProSitePatterns	PS00678	Trp-Asp (WD) repeats signature.	IPR019775	WD40 repeat, conserved site
FtPinG0001538300.01.T01	ProSiteProfiles	PS50082	Trp-Asp (WD) repeats profile.	IPR001680	WD40 repeat	GO:0005515
FtPinG0001538300.01.T01	PRINTS	PR00319	Beta G protein (transducin) signature	IPR001632	G-protein, beta subunit
FtPinG0001538300.01.T01	PRINTS	PR00319	Beta G protein (transducin) signature	IPR001632	G-protein, beta subunit
FtPinG0001538300.01.T01	PRINTS	PR00319	Beta G protein (transducin) signature	IPR001632	G-protein, beta subunit
FtPinG0001538300.01.T01	SUPERFAMILY	SSF50998		IPR011047	Quinoprotein alcohol dehydrogenase-like superfamily
FtPinG0001538300.01.T01	SUPERFAMILY	SSF50998		IPR011047	Quinoprotein alcohol dehydrogenase-like superfamily
FtPinG0001538300.01.T01	ProSiteProfiles	PS50082	Trp-Asp (WD) repeats profile.	IPR001680	WD40 repeat	GO:0005515
FtPinG0001538300.01.T01	Gene3D	G3DSA:2.130.10.10		IPR015943	WD40/YVTN repeat-like-containing domain superfamily	GO:0005515
FtPinG0001538300.01.T01	CDD	cd00200	WD40
FtPinG0001538300.01.T01	ProSitePatterns	PS00678	Trp-Asp (WD) repeats signature.	IPR019775	WD40 repeat, conserved site
FtPinG0001538300.01.T01	ProSitePatterns	PS00678	Trp-Asp (WD) repeats signature.	IPR019775	WD40 repeat, conserved site
FtPinG0001538300.01.T01	ProSiteProfiles	PS50082	Trp-Asp (WD) repeats profile.	IPR001680	WD40 repeat	GO:0005515
FtPinG0001538300.01.T01	PRINTS	PR00320	G protein beta WD-40 repeat signature	IPR020472	G-protein beta WD-40 repeat
FtPinG0001538300.01.T01	PRINTS	PR00320	G protein beta WD-40 repeat signature	IPR020472	G-protein beta WD-40 repeat
FtPinG0001538300.01.T01	PRINTS	PR00320	G protein beta WD-40 repeat signature	IPR020472	G-protein beta WD-40 repeat
FtPinG0001538300.01.T01	Pfam	PF00400	WD domain, G-beta repeat	IPR001680	WD40 repeat	GO:0005515
FtPinG0001538300.01.T01	Pfam	PF00400	WD domain, G-beta repeat	IPR001680	WD40 repeat	GO:0005515
FtPinG0001538300.01.T01	Pfam	PF00400	WD domain, G-beta repeat	IPR001680	WD40 repeat	GO:0005515
FtPinG0001538300.01.T01	Pfam	PF00400	WD domain, G-beta repeat	IPR001680	WD40 repeat	GO:0005515
FtPinG0001538300.01.T01	Pfam	PF00400	WD domain, G-beta repeat	IPR001680	WD40 repeat	GO:0005515
FtPinG0001538300.01.T01	Pfam	PF00400	WD domain, G-beta repeat	IPR001680	WD40 repeat	GO:0005515
FtPinG0001538300.01.T01	Pfam	PF00400	WD domain, G-beta repeat	IPR001680	WD40 repeat	GO:0005515
FtPinG0001538300.01.T01	Pfam	PF00400	WD domain, G-beta repeat	IPR001680	WD40 repeat	GO:0005515
FtPinG0001538300.01.T01	ProSiteProfiles	PS50082	Trp-Asp (WD) repeats profile.	IPR001680	WD40 repeat	GO:0005515
FtPinG0001538300.01.T01	ProSitePatterns	PS00678	Trp-Asp (WD) repeats signature.	IPR019775	WD40 repeat, conserved site
FtPinG0009458400.01.T01	Pfam	PF09724	Sister chromatid cohesion protein Dcc1	IPR019128	Sister chromatid cohesion protein Dcc1	GO:0007064|GO:0031390
FtPinG0003491900.01.T01	Coils	Coil
FtPinG0003491900.01.T01	ProSiteProfiles	PS51715	GB1/RHD3-type guanine nucleotide-binding (G) domain profile.	IPR030386	GB1/RHD3-type guanine nucleotide-binding (G) domain	GO:0005525
FtPinG0003491900.01.T01	Pfam	PF05879	Root hair defective 3 GTP-binding protein (RHD3)	IPR008803	RHD3/Sey1
FtPinG0003491900.01.T01	SUPERFAMILY	SSF52540		IPR027417	P-loop containing nucleoside triphosphate hydrolase
FtPinG0003491900.01.T01	Gene3D	G3DSA:3.40.50.300
FtPinG0006495900.01.T02	Gene3D	G3DSA:3.30.430.20		IPR038408	Gnk2-homologous domain superfamily
FtPinG0006495900.01.T02	MobiDBLite	mobidb-lite	consensus disorder prediction
FtPinG0006495900.01.T02	ProSiteProfiles	PS51473	Gnk2-homologous domain profile.	IPR002902	Gnk2-homologous domain
FtPinG0006495900.01.T02	Pfam	PF01657	Salt stress response/antifungal	IPR002902	Gnk2-homologous domain
FtPinG0001529300.01.T01	ProSiteProfiles	PS50012	Regulator of chromosome condensation (RCC1) repeat profile.	IPR000408	Regulator of chromosome condensation, RCC1
FtPinG0001529300.01.T01	MobiDBLite	mobidb-lite	consensus disorder prediction
FtPinG0001529300.01.T01	ProSiteProfiles	PS50012	Regulator of chromosome condensation (RCC1) repeat profile.	IPR000408	Regulator of chromosome condensation, RCC1
FtPinG0001529300.01.T01	Gene3D	G3DSA:2.130.10.30		IPR009091	Regulator of chromosome condensation 1/beta-lactamase-inhibitor protein II
FtPinG0001529300.01.T01	Gene3D	G3DSA:2.130.10.30		IPR009091	Regulator of chromosome condensation 1/beta-lactamase-inhibitor protein II
FtPinG0001529300.01.T01	ProSiteProfiles	PS50012	Regulator of chromosome condensation (RCC1) repeat profile.	IPR000408	Regulator of chromosome condensation, RCC1
FtPinG0001529300.01.T01	ProSitePatterns	PS00626	Regulator of chromosome condensation (RCC1) signature 2.	IPR000408	Regulator of chromosome condensation, RCC1
FtPinG0001529300.01.T01	SUPERFAMILY	SSF50985		IPR009091	Regulator of chromosome condensation 1/beta-lactamase-inhibitor protein II
FtPinG0001529300.01.T01	Pfam	PF00415	Regulator of chromosome condensation (RCC1) repeat	IPR000408	Regulator of chromosome condensation, RCC1
FtPinG0001529300.01.T01	Pfam	PF00415	Regulator of chromosome condensation (RCC1) repeat	IPR000408	Regulator of chromosome condensation, RCC1
FtPinG0001529300.01.T01	Pfam	PF00415	Regulator of chromosome condensation (RCC1) repeat	IPR000408	Regulator of chromosome condensation, RCC1
FtPinG0001529300.01.T01	Pfam	PF00415	Regulator of chromosome condensation (RCC1) repeat	IPR000408	Regulator of chromosome condensation, RCC1
FtPinG0001529300.01.T01	Pfam	PF00415	Regulator of chromosome condensation (RCC1) repeat	IPR000408	Regulator of chromosome condensation, RCC1
FtPinG0001529300.01.T01	PRINTS	PR00633	Chromosome condensation regulator RCC1 signature	IPR000408	Regulator of chromosome condensation, RCC1
FtPinG0001529300.01.T01	PRINTS	PR00633	Chromosome condensation regulator RCC1 signature	IPR000408	Regulator of chromosome condensation, RCC1
FtPinG0001529300.01.T01	PRINTS	PR00633	Chromosome condensation regulator RCC1 signature	IPR000408	Regulator of chromosome condensation, RCC1
FtPinG0001529300.01.T01	PRINTS	PR00633	Chromosome condensation regulator RCC1 signature	IPR000408	Regulator of chromosome condensation, RCC1
FtPinG0001529300.01.T01	PRINTS	PR00633	Chromosome condensation regulator RCC1 signature	IPR000408	Regulator of chromosome condensation, RCC1
FtPinG0001529300.01.T01	ProSiteProfiles	PS50012	Regulator of chromosome condensation (RCC1) repeat profile.	IPR000408	Regulator of chromosome condensation, RCC1
FtPinG0001529300.01.T01	ProSiteProfiles	PS50012	Regulator of chromosome condensation (RCC1) repeat profile.	IPR000408	Regulator of chromosome condensation, RCC1
FtPinG0007081000.01.T01	CDD	cd14798	RX-CC_like	IPR038005	Virus X resistance protein-like, coiled-coil domain
FtPinG0007081000.01.T01	SUPERFAMILY	SSF52540		IPR027417	P-loop containing nucleoside triphosphate hydrolase
FtPinG0007081000.01.T01	Pfam	PF00931	NB-ARC domain	IPR002182	NB-ARC	GO:0043531	Reactome: R-HSA-111458|Reactome: R-HSA-111459|Reactome: R-HSA-6798695|Reactome: R-HSA-6803207|Reactome: R-HSA-8953750
FtPinG0007081000.01.T01	Gene3D	G3DSA:3.40.50.300
FtPinG0007081000.01.T01	PRINTS	PR00364	Disease resistance protein signature
FtPinG0007081000.01.T01	PRINTS	PR00364	Disease resistance protein signature
FtPinG0006496300.01.T01	MobiDBLite	mobidb-lite	consensus disorder prediction
FtPinG0006496300.01.T01	Gene3D	G3DSA:3.30.430.20		IPR038408	Gnk2-homologous domain superfamily
FtPinG0006496300.01.T01	Gene3D	G3DSA:3.30.430.20		IPR038408	Gnk2-homologous domain superfamily
FtPinG0006496300.01.T01	ProSiteProfiles	PS51473	Gnk2-homologous domain profile.	IPR002902	Gnk2-homologous domain
FtPinG0006496300.01.T01	ProSiteProfiles	PS51473	Gnk2-homologous domain profile.	IPR002902	Gnk2-homologous domain
FtPinG0006496300.01.T01	Pfam	PF01657	Salt stress response/antifungal	IPR002902	Gnk2-homologous domain
FtPinG0006496300.01.T01	Pfam	PF01657	Salt stress response/antifungal	IPR002902	Gnk2-homologous domain
FtPinG0006104100.01.T01	Gene3D	G3DSA:3.30.70.260
FtPinG0006104100.01.T01	ProSiteProfiles	PS51671	ACT domain profile.	IPR002912	ACT domain
FtPinG0006104100.01.T01	SUPERFAMILY	SSF55021
FtPinG0006104100.01.T01	SUPERFAMILY	SSF55021
FtPinG0005355300.01.T01	MobiDBLite	mobidb-lite	consensus disorder prediction
FtPinG0006324700.01.T01	Gene3D	G3DSA:3.30.200.20
FtPinG0006324700.01.T01	ProSiteProfiles	PS50011	Protein kinase domain profile.	IPR000719	Protein kinase domain	GO:0004672|GO:0005524|GO:0006468
FtPinG0006324700.01.T01	Gene3D	G3DSA:1.10.510.10
FtPinG0006324700.01.T01	Pfam	PF07714	Protein tyrosine kinase	IPR001245	Serine-threonine/tyrosine-protein kinase, catalytic domain	GO:0004672|GO:0006468
FtPinG0006324700.01.T01	SMART	SM00220		IPR000719	Protein kinase domain	GO:0004672|GO:0005524|GO:0006468
FtPinG0006324700.01.T01	PIRSF	PIRSF000654
FtPinG0006324700.01.T01	SUPERFAMILY	SSF56112		IPR011009	Protein kinase-like domain superfamily
FtPinG0006324700.01.T01	ProSitePatterns	PS00108	Serine/Threonine protein kinases active-site signature.	IPR008271	Serine/threonine-protein kinase, active site	GO:0004672|GO:0006468
FtPinG0007082400.01.T01	Gene3D	G3DSA:3.30.730.10		IPR036955	AP2/ERF domain superfamily	GO:0003700|GO:0006355
FtPinG0007082400.01.T01	Gene3D	G3DSA:3.30.730.10		IPR036955	AP2/ERF domain superfamily	GO:0003700|GO:0006355
FtPinG0007082400.01.T01	Gene3D	G3DSA:3.30.730.10		IPR036955	AP2/ERF domain superfamily	GO:0003700|GO:0006355
FtPinG0007082400.01.T01	Gene3D	G3DSA:3.30.730.10		IPR036955	AP2/ERF domain superfamily	GO:0003700|GO:0006355
FtPinG0007082400.01.T01	SMART	SM00380		IPR001471	AP2/ERF domain	GO:0003700|GO:0006355
FtPinG0007082400.01.T01	SMART	SM00380		IPR001471	AP2/ERF domain	GO:0003700|GO:0006355
FtPinG0007082400.01.T01	SMART	SM00380		IPR001471	AP2/ERF domain	GO:0003700|GO:0006355
FtPinG0007082400.01.T01	SUPERFAMILY	SSF54171		IPR016177	DNA-binding domain superfamily	GO:0003677
FtPinG0007082400.01.T01	SUPERFAMILY	SSF54171		IPR016177	DNA-binding domain superfamily	GO:0003677
FtPinG0007082400.01.T01	MobiDBLite	mobidb-lite	consensus disorder prediction
FtPinG0007082400.01.T01	ProSiteProfiles	PS51032	AP2/ERF domain profile.	IPR001471	AP2/ERF domain	GO:0003700|GO:0006355
FtPinG0007082400.01.T01	MobiDBLite	mobidb-lite	consensus disorder prediction
FtPinG0007082400.01.T01	ProSiteProfiles	PS51032	AP2/ERF domain profile.	IPR001471	AP2/ERF domain	GO:0003700|GO:0006355
FtPinG0007082400.01.T01	SUPERFAMILY	SSF54171		IPR016177	DNA-binding domain superfamily	GO:0003677
FtPinG0007082400.01.T01	ProSiteProfiles	PS51032	AP2/ERF domain profile.	IPR001471	AP2/ERF domain	GO:0003700|GO:0006355
FtPinG0007082400.01.T01	SUPERFAMILY	SSF54171		IPR016177	DNA-binding domain superfamily	GO:0003677
FtPinG0007082400.01.T01	ProSiteProfiles	PS51032	AP2/ERF domain profile.	IPR001471	AP2/ERF domain	GO:0003700|GO:0006355
FtPinG0007082600.01.T01	ProSiteProfiles	PS50879	RNase H domain profile.	IPR002156	Ribonuclease H domain	GO:0003676|GO:0004523
FtPinG0007082600.01.T01	SUPERFAMILY	SSF53098		IPR012337	Ribonuclease H-like superfamily
FtPinG0007082600.01.T01	Gene3D	G3DSA:3.30.420.10		IPR036397	Ribonuclease H superfamily	GO:0003676
FtPinG0007082600.01.T01	Pfam	PF13966	zinc-binding in reverse transcriptase	IPR026960	Reverse transcriptase zinc-binding domain
FtPinG0007082600.01.T01	CDD	cd06222	RNase_H_like
FtPinG0007082600.01.T01	Pfam	PF13456	Reverse transcriptase-like
FtPinG0006160900.01.T01	SUPERFAMILY	SSF50630		IPR021109	Aspartic peptidase domain superfamily
FtPinG0006160900.01.T01	Pfam	PF00026	Eukaryotic aspartyl protease	IPR033121	Peptidase family A1 domain
FtPinG0006160900.01.T01	Gene3D	G3DSA:2.40.70.10		IPR021109	Aspartic peptidase domain superfamily
FtPinG0005599700.01.T01	MobiDBLite	mobidb-lite	consensus disorder prediction
FtPinG0005599700.01.T01	MobiDBLite	mobidb-lite	consensus disorder prediction
FtPinG0005258300.01.T01	SUPERFAMILY	SSF56672
FtPinG0005258300.01.T01	CDD	cd09272	RNase_HI_RT_Ty1
FtPinG0009459500.01.T01	Pfam	PF03083	Sugar efflux transporter for intercellular exchange	IPR004316	SWEET sugar transporter	GO:0016021	Reactome: R-HSA-189200
FtPinG0009459500.01.T01	Pfam	PF03083	Sugar efflux transporter for intercellular exchange	IPR004316	SWEET sugar transporter	GO:0016021	Reactome: R-HSA-189200
FtPinG0009459500.01.T01	Gene3D	G3DSA:1.20.1280.290
FtPinG0001530000.01.T01	Hamap	MF_00051	Serine hydroxymethyltransferase [glyA].	IPR001085	Serine hydroxymethyltransferase	GO:0004372|GO:0019264|GO:0030170|GO:0035999	KEGG: 00260+2.1.2.1|KEGG: 00460+2.1.2.1|KEGG: 00630+2.1.2.1|KEGG: 00670+2.1.2.1|KEGG: 00680+2.1.2.1|MetaCyc: PWY-1622|MetaCyc: PWY-181|MetaCyc: PWY-2161|MetaCyc: PWY-2201|MetaCyc: PWY-3661|MetaCyc: PWY-3661-1|MetaCyc: PWY-3841|MetaCyc: PWY-5497|Reactome: R-HSA-196757
FtPinG0001530000.01.T01	Gene3D	G3DSA:3.90.1150.10		IPR015422	Pyridoxal phosphate-dependent transferase domain 1	GO:0003824
FtPinG0001530000.01.T01	Gene3D	G3DSA:3.90.1150.10		IPR015422	Pyridoxal phosphate-dependent transferase domain 1	GO:0003824
FtPinG0001530000.01.T01	ProSitePatterns	PS00096	Serine hydroxymethyltransferase pyridoxal-phosphate attachment site.	IPR019798	Serine hydroxymethyltransferase, pyridoxal phosphate binding site	GO:0030170	KEGG: 00260+2.1.2.1|KEGG: 00460+2.1.2.1|KEGG: 00630+2.1.2.1|KEGG: 00670+2.1.2.1|KEGG: 00680+2.1.2.1|MetaCyc: PWY-1622|MetaCyc: PWY-181|MetaCyc: PWY-2161|MetaCyc: PWY-2201|MetaCyc: PWY-3661|MetaCyc: PWY-3661-1|MetaCyc: PWY-3841|MetaCyc: PWY-5497|Reactome: R-HSA-196757
FtPinG0001530000.01.T01	Pfam	PF00464	Serine hydroxymethyltransferase
FtPinG0001530000.01.T01	PIRSF	PIRSF000412		IPR001085	Serine hydroxymethyltransferase	GO:0004372|GO:0019264|GO:0030170|GO:0035999	KEGG: 00260+2.1.2.1|KEGG: 00460+2.1.2.1|KEGG: 00630+2.1.2.1|KEGG: 00670+2.1.2.1|KEGG: 00680+2.1.2.1|MetaCyc: PWY-1622|MetaCyc: PWY-181|MetaCyc: PWY-2161|MetaCyc: PWY-2201|MetaCyc: PWY-3661|MetaCyc: PWY-3661-1|MetaCyc: PWY-3841|MetaCyc: PWY-5497|Reactome: R-HSA-196757
FtPinG0001530000.01.T01	Coils	Coil
FtPinG0001530000.01.T01	SUPERFAMILY	SSF53383		IPR015424	Pyridoxal phosphate-dependent transferase
FtPinG0001530000.01.T01	CDD	cd00378	SHMT	IPR001085	Serine hydroxymethyltransferase	GO:0004372|GO:0019264|GO:0030170|GO:0035999	KEGG: 00260+2.1.2.1|KEGG: 00460+2.1.2.1|KEGG: 00630+2.1.2.1|KEGG: 00670+2.1.2.1|KEGG: 00680+2.1.2.1|MetaCyc: PWY-1622|MetaCyc: PWY-181|MetaCyc: PWY-2161|MetaCyc: PWY-2201|MetaCyc: PWY-3661|MetaCyc: PWY-3661-1|MetaCyc: PWY-3841|MetaCyc: PWY-5497|Reactome: R-HSA-196757
FtPinG0001530000.01.T01	Gene3D	G3DSA:3.40.640.10		IPR015421	Pyridoxal phosphate-dependent transferase, major domain	GO:0003824
FtPinG0004865700.01.T01	Pfam	PF07722	Peptidase C26	IPR011697	Peptidase C26	GO:0016787	Reactome: R-HSA-6798695
FtPinG0004865700.01.T01	SUPERFAMILY	SSF52317		IPR029062	Class I glutamine amidotransferase-like
FtPinG0004865700.01.T01	SUPERFAMILY	SSF52317		IPR029062	Class I glutamine amidotransferase-like
FtPinG0004865700.01.T01	CDD	cd01745	GATase1_2
FtPinG0004865700.01.T01	Gene3D	G3DSA:3.40.50.880		IPR029062	Class I glutamine amidotransferase-like
FtPinG0004865700.01.T01	ProSiteProfiles	PS51273	Glutamine amidotransferase type 1 domain profile.	IPR017926	Glutamine amidotransferase
FtPinG0009459200.01.T01	Gene3D	G3DSA:1.10.520.10
FtPinG0009459200.01.T01	Gene3D	G3DSA:1.10.520.10
FtPinG0009459200.01.T01	ProSitePatterns	PS00435	Peroxidases proximal heme-ligand signature.	IPR019793	Peroxidases heam-ligand binding site		Reactome: R-HSA-2408557
FtPinG0009459200.01.T01	ProSiteProfiles	PS50873	Plant heme peroxidase family profile.	IPR002016	Haem peroxidase, plant/fungal/bacterial	GO:0004601|GO:0006979|GO:0020037|GO:0055114
FtPinG0009459200.01.T01	PRINTS	PR00461	Plant peroxidase signature	IPR000823	Plant peroxidase	GO:0004601|GO:0006979|GO:0020037|GO:0055114	KEGG: 00940+1.11.1.7|MetaCyc: PWY-5461|MetaCyc: PWY-5466|MetaCyc: PWY-5469|MetaCyc: PWY-6824|MetaCyc: PWY-7214|MetaCyc: PWY-7445
FtPinG0009459200.01.T01	PRINTS	PR00461	Plant peroxidase signature	IPR000823	Plant peroxidase	GO:0004601|GO:0006979|GO:0020037|GO:0055114	KEGG: 00940+1.11.1.7|MetaCyc: PWY-5461|MetaCyc: PWY-5466|MetaCyc: PWY-5469|MetaCyc: PWY-6824|MetaCyc: PWY-7214|MetaCyc: PWY-7445
FtPinG0009459200.01.T01	PRINTS	PR00461	Plant peroxidase signature	IPR000823	Plant peroxidase	GO:0004601|GO:0006979|GO:0020037|GO:0055114	KEGG: 00940+1.11.1.7|MetaCyc: PWY-5461|MetaCyc: PWY-5466|MetaCyc: PWY-5469|MetaCyc: PWY-6824|MetaCyc: PWY-7214|MetaCyc: PWY-7445
FtPinG0009459200.01.T01	PRINTS	PR00461	Plant peroxidase signature	IPR000823	Plant peroxidase	GO:0004601|GO:0006979|GO:0020037|GO:0055114	KEGG: 00940+1.11.1.7|MetaCyc: PWY-5461|MetaCyc: PWY-5466|MetaCyc: PWY-5469|MetaCyc: PWY-6824|MetaCyc: PWY-7214|MetaCyc: PWY-7445
FtPinG0009459200.01.T01	PRINTS	PR00461	Plant peroxidase signature	IPR000823	Plant peroxidase	GO:0004601|GO:0006979|GO:0020037|GO:0055114	KEGG: 00940+1.11.1.7|MetaCyc: PWY-5461|MetaCyc: PWY-5466|MetaCyc: PWY-5469|MetaCyc: PWY-6824|MetaCyc: PWY-7214|MetaCyc: PWY-7445
FtPinG0009459200.01.T01	PRINTS	PR00461	Plant peroxidase signature	IPR000823	Plant peroxidase	GO:0004601|GO:0006979|GO:0020037|GO:0055114	KEGG: 00940+1.11.1.7|MetaCyc: PWY-5461|MetaCyc: PWY-5466|MetaCyc: PWY-5469|MetaCyc: PWY-6824|MetaCyc: PWY-7214|MetaCyc: PWY-7445
FtPinG0009459200.01.T01	PRINTS	PR00461	Plant peroxidase signature	IPR000823	Plant peroxidase	GO:0004601|GO:0006979|GO:0020037|GO:0055114	KEGG: 00940+1.11.1.7|MetaCyc: PWY-5461|MetaCyc: PWY-5466|MetaCyc: PWY-5469|MetaCyc: PWY-6824|MetaCyc: PWY-7214|MetaCyc: PWY-7445
FtPinG0009459200.01.T01	PRINTS	PR00461	Plant peroxidase signature	IPR000823	Plant peroxidase	GO:0004601|GO:0006979|GO:0020037|GO:0055114	KEGG: 00940+1.11.1.7|MetaCyc: PWY-5461|MetaCyc: PWY-5466|MetaCyc: PWY-5469|MetaCyc: PWY-6824|MetaCyc: PWY-7214|MetaCyc: PWY-7445
FtPinG0009459200.01.T01	PRINTS	PR00461	Plant peroxidase signature	IPR000823	Plant peroxidase	GO:0004601|GO:0006979|GO:0020037|GO:0055114	KEGG: 00940+1.11.1.7|MetaCyc: PWY-5461|MetaCyc: PWY-5466|MetaCyc: PWY-5469|MetaCyc: PWY-6824|MetaCyc: PWY-7214|MetaCyc: PWY-7445
FtPinG0009459200.01.T01	PRINTS	PR00458	Haem peroxidase superfamily signature	IPR002016	Haem peroxidase, plant/fungal/bacterial	GO:0004601|GO:0006979|GO:0020037|GO:0055114
FtPinG0009459200.01.T01	PRINTS	PR00458	Haem peroxidase superfamily signature	IPR002016	Haem peroxidase, plant/fungal/bacterial	GO:0004601|GO:0006979|GO:0020037|GO:0055114
FtPinG0009459200.01.T01	PRINTS	PR00458	Haem peroxidase superfamily signature	IPR002016	Haem peroxidase, plant/fungal/bacterial	GO:0004601|GO:0006979|GO:0020037|GO:0055114
FtPinG0009459200.01.T01	PRINTS	PR00458	Haem peroxidase superfamily signature	IPR002016	Haem peroxidase, plant/fungal/bacterial	GO:0004601|GO:0006979|GO:0020037|GO:0055114
FtPinG0009459200.01.T01	PRINTS	PR00458	Haem peroxidase superfamily signature	IPR002016	Haem peroxidase, plant/fungal/bacterial	GO:0004601|GO:0006979|GO:0020037|GO:0055114
FtPinG0009459200.01.T01	Pfam	PF00141	Peroxidase	IPR002016	Haem peroxidase, plant/fungal/bacterial	GO:0004601|GO:0006979|GO:0020037|GO:0055114
FtPinG0009459200.01.T01	Gene3D	G3DSA:1.10.420.10
FtPinG0009459200.01.T01	CDD	cd00693	secretory_peroxidase	IPR033905	Secretory peroxidase	GO:0004601|GO:0042744	KEGG: 00940+1.11.1.7|MetaCyc: PWY-5461|MetaCyc: PWY-5466|MetaCyc: PWY-5469|MetaCyc: PWY-6824|MetaCyc: PWY-7214|MetaCyc: PWY-7445
FtPinG0009459200.01.T01	SUPERFAMILY	SSF48113		IPR010255	Haem peroxidase	GO:0004601|GO:0006979|GO:0020037|GO:0055114
FtPinG0006244900.01.T02	SUPERFAMILY	SSF55455		IPR036879	Transcription factor, MADS-box superfamily	GO:0003677|GO:0046983	Reactome: R-HSA-375170
FtPinG0006244900.01.T02	ProSiteProfiles	PS50066	MADS-box domain profile.	IPR002100	Transcription factor, MADS-box	GO:0003677|GO:0046983	Reactome: R-HSA-375170
FtPinG0006244900.01.T02	MobiDBLite	mobidb-lite	consensus disorder prediction
FtPinG0009546600.01.T01	MobiDBLite	mobidb-lite	consensus disorder prediction
FtPinG0009546600.01.T01	Pfam	PF01459	Eukaryotic porin	IPR027246	Eukaryotic porin/Tom40	GO:0005741|GO:0055085
FtPinG0009546600.01.T01	Gene3D	G3DSA:2.40.160.10		IPR023614	Porin domain superfamily
FtPinG0009546600.01.T01	CDD	cd07305	Porin3_Tom40	IPR037930	Tom40	GO:0005741|GO:0008320|GO:0030150
FtPinG0007196800.01.T01	CDD	cd12254	RRM_hnRNPH_ESRPs_RBM12_like
FtPinG0007196800.01.T01	SMART	SM00360		IPR000504	RNA recognition motif domain	GO:0003676
FtPinG0007196800.01.T01	SMART	SM00360		IPR000504	RNA recognition motif domain	GO:0003676
FtPinG0007196800.01.T01	ProSiteProfiles	PS50102	Eukaryotic RNA Recognition Motif (RRM) profile.	IPR000504	RNA recognition motif domain	GO:0003676
FtPinG0007196800.01.T01	CDD	cd12254	RRM_hnRNPH_ESRPs_RBM12_like
FtPinG0007196800.01.T01	Pfam	PF00076	RNA recognition motif. (a.k.a. RRM, RBD, or RNP domain)	IPR000504	RNA recognition motif domain	GO:0003676
FtPinG0007196800.01.T01	Pfam	PF00076	RNA recognition motif. (a.k.a. RRM, RBD, or RNP domain)	IPR000504	RNA recognition motif domain	GO:0003676
FtPinG0007196800.01.T01	ProSiteProfiles	PS50102	Eukaryotic RNA Recognition Motif (RRM) profile.	IPR000504	RNA recognition motif domain	GO:0003676
FtPinG0007196800.01.T01	SUPERFAMILY	SSF54928		IPR035979	RNA-binding domain superfamily	GO:0003676
FtPinG0007196800.01.T01	SUPERFAMILY	SSF54928		IPR035979	RNA-binding domain superfamily	GO:0003676
FtPinG0007196800.01.T01	Gene3D	G3DSA:3.30.70.330		IPR012677	Nucleotide-binding alpha-beta plait domain superfamily
FtPinG0007196800.01.T01	Gene3D	G3DSA:3.30.70.330		IPR012677	Nucleotide-binding alpha-beta plait domain superfamily
FtPinG0007535900.01.T01	PIRSF	PIRSF038122		IPR006918	COBRA, plant	GO:0010215|GO:0016049|GO:0031225
FtPinG0007535900.01.T01	PIRSF	PIRSF038122		IPR006918	COBRA, plant	GO:0010215|GO:0016049|GO:0031225
FtPinG0007535900.01.T01	ProDom	PD140986	PHYTOCHELATIN GLYCOPROTEIN COBRA-LIKE PRECURSOR SIGNAL MEMBRANE GPI-ANCHOR LIPOPROTEIN SYNTHETASE SYNTHETASE-LIKE	IPR006918	COBRA, plant	GO:0010215|GO:0016049|GO:0031225
FtPinG0007535900.01.T01	Pfam	PF04833	COBRA-like protein	IPR006918	COBRA, plant	GO:0010215|GO:0016049|GO:0031225
FtPinG0000053600.01.T01	MobiDBLite	mobidb-lite	consensus disorder prediction
FtPinG0000053600.01.T01	MobiDBLite	mobidb-lite	consensus disorder prediction
FtPinG0007081200.01.T01	Pfam	PF08718	Glycolipid transfer protein (GLTP)	IPR014830	Glycolipid transfer protein domain	GO:0005737|GO:0120009|GO:0120013
FtPinG0007081200.01.T01	Gene3D	G3DSA:1.10.3520.10		IPR036497	Glycolipid transfer protein superfamily
FtPinG0007081200.01.T01	SUPERFAMILY	SSF110004		IPR036497	Glycolipid transfer protein superfamily
FtPinG0007536100.01.T01	Pfam	PF05623	Protein of unknown function (DUF789)	IPR008507	Protein of unknown function DUF789
FtPinG0007536100.01.T01	MobiDBLite	mobidb-lite	consensus disorder prediction
FtPinG0005602100.01.T01	MobiDBLite	mobidb-lite	consensus disorder prediction
FtPinG0005354800.01.T01	Gene3D	G3DSA:3.30.70.330		IPR012677	Nucleotide-binding alpha-beta plait domain superfamily
FtPinG0005354800.01.T01	Gene3D	G3DSA:3.30.70.330		IPR012677	Nucleotide-binding alpha-beta plait domain superfamily
FtPinG0005354800.01.T01	MobiDBLite	mobidb-lite	consensus disorder prediction
FtPinG0005354800.01.T01	ProSiteProfiles	PS50102	Eukaryotic RNA Recognition Motif (RRM) profile.	IPR000504	RNA recognition motif domain	GO:0003676
FtPinG0005354800.01.T01	Gene3D	G3DSA:3.30.70.330		IPR012677	Nucleotide-binding alpha-beta plait domain superfamily
FtPinG0005354800.01.T01	CDD	cd12414	RRM2_RBM28_like
FtPinG0005354800.01.T01	MobiDBLite	mobidb-lite	consensus disorder prediction
FtPinG0005354800.01.T01	SMART	SM00360		IPR000504	RNA recognition motif domain	GO:0003676
FtPinG0005354800.01.T01	SMART	SM00360		IPR000504	RNA recognition motif domain	GO:0003676
FtPinG0005354800.01.T01	SMART	SM00360		IPR000504	RNA recognition motif domain	GO:0003676
FtPinG0005354800.01.T01	SMART	SM00360		IPR000504	RNA recognition motif domain	GO:0003676
FtPinG0005354800.01.T01	CDD	cd12416	RRM4_RBM28_like
FtPinG0005354800.01.T01	MobiDBLite	mobidb-lite	consensus disorder prediction
FtPinG0005354800.01.T01	SUPERFAMILY	SSF54928		IPR035979	RNA-binding domain superfamily	GO:0003676
FtPinG0005354800.01.T01	SUPERFAMILY	SSF54928		IPR035979	RNA-binding domain superfamily	GO:0003676
FtPinG0005354800.01.T01	SUPERFAMILY	SSF54928		IPR035979	RNA-binding domain superfamily	GO:0003676
FtPinG0005354800.01.T01	SUPERFAMILY	SSF54928		IPR035979	RNA-binding domain superfamily	GO:0003676
FtPinG0005354800.01.T01	SUPERFAMILY	SSF54928		IPR035979	RNA-binding domain superfamily	GO:0003676
FtPinG0005354800.01.T01	ProSiteProfiles	PS50102	Eukaryotic RNA Recognition Motif (RRM) profile.	IPR000504	RNA recognition motif domain	GO:0003676
FtPinG0005354800.01.T01	Pfam	PF00076	RNA recognition motif. (a.k.a. RRM, RBD, or RNP domain)	IPR000504	RNA recognition motif domain	GO:0003676
FtPinG0005354800.01.T01	Pfam	PF00076	RNA recognition motif. (a.k.a. RRM, RBD, or RNP domain)	IPR000504	RNA recognition motif domain	GO:0003676
FtPinG0005354800.01.T01	Pfam	PF00076	RNA recognition motif. (a.k.a. RRM, RBD, or RNP domain)	IPR000504	RNA recognition motif domain	GO:0003676
FtPinG0005354800.01.T01	ProSiteProfiles	PS50102	Eukaryotic RNA Recognition Motif (RRM) profile.	IPR000504	RNA recognition motif domain	GO:0003676
FtPinG0005354800.01.T01	MobiDBLite	mobidb-lite	consensus disorder prediction
FtPinG0005354800.01.T01	Coils	Coil
FtPinG0005354800.01.T01	ProSiteProfiles	PS50102	Eukaryotic RNA Recognition Motif (RRM) profile.	IPR000504	RNA recognition motif domain	GO:0003676
FtPinG0005354800.01.T01	CDD	cd12413	RRM1_RBM28_like
FtPinG0005354800.01.T01	Gene3D	G3DSA:3.30.70.330		IPR012677	Nucleotide-binding alpha-beta plait domain superfamily
FtPinG0006999200.01.T01	Gene3D	G3DSA:3.40.50.2020
FtPinG0006999200.01.T01	Pfam	PF00156	Phosphoribosyl transferase domain	IPR000836	Phosphoribosyltransferase domain	GO:0009116
FtPinG0006999200.01.T01	SUPERFAMILY	SSF53271		IPR029057	Phosphoribosyltransferase-like
FtPinG0006999200.01.T01	CDD	cd06223	PRTases_typeI	IPR000836	Phosphoribosyltransferase domain	GO:0009116
FtPinG0006999200.01.T01	Hamap	MF_00004	Adenine phosphoribosyltransferase [apt].	IPR005764	Adenine phosphoribosyl transferase	GO:0003999|GO:0005737|GO:0006168	KEGG: 00230+2.4.2.7|MetaCyc: PWY-6605|MetaCyc: PWY-6610|MetaCyc: PWY-7805|MetaCyc: PWY-7807|Reactome: R-HSA-6798695|Reactome: R-HSA-74217
FtPinG0006999200.01.T01	TIGRFAM	TIGR01090	apt: adenine phosphoribosyltransferase	IPR005764	Adenine phosphoribosyl transferase	GO:0003999|GO:0005737|GO:0006168	KEGG: 00230+2.4.2.7|MetaCyc: PWY-6605|MetaCyc: PWY-6610|MetaCyc: PWY-7805|MetaCyc: PWY-7807|Reactome: R-HSA-6798695|Reactome: R-HSA-74217
FtPinG0001529700.01.T01	ProSiteProfiles	PS50011	Protein kinase domain profile.	IPR000719	Protein kinase domain	GO:0004672|GO:0005524|GO:0006468
FtPinG0001529700.01.T01	Pfam	PF00069	Protein kinase domain	IPR000719	Protein kinase domain	GO:0004672|GO:0005524|GO:0006468
FtPinG0001529700.01.T01	Gene3D	G3DSA:3.30.310.80
FtPinG0001529700.01.T01	Gene3D	G3DSA:1.10.510.10
FtPinG0001529700.01.T01	ProSitePatterns	PS00108	Serine/Threonine protein kinases active-site signature.	IPR008271	Serine/threonine-protein kinase, active site	GO:0004672|GO:0006468
FtPinG0001529700.01.T01	ProSiteProfiles	PS50816	NAF domain profile.	IPR018451	NAF/FISL domain	GO:0007165	KEGG: 04150+2.7.11.1|KEGG: 04151+2.7.11.1|KEGG: 04714+2.7.11.1|KEGG: 04926+2.7.11.1|KEGG: 05165+2.7.11.1
FtPinG0001529700.01.T01	CDD	cd12195	CIPK_C
FtPinG0001529700.01.T01	SUPERFAMILY	SSF56112		IPR011009	Protein kinase-like domain superfamily
FtPinG0001529700.01.T01	Gene3D	G3DSA:3.30.200.20
FtPinG0001529700.01.T01	SMART	SM00220		IPR000719	Protein kinase domain	GO:0004672|GO:0005524|GO:0006468
FtPinG0001529700.01.T01	ProSitePatterns	PS00107	Protein kinases ATP-binding region signature.	IPR017441	Protein kinase, ATP binding site	GO:0005524
FtPinG0001529700.01.T01	Pfam	PF03822	NAF domain	IPR004041	NAF domain	GO:0007165	KEGG: 04150+2.7.11.1|KEGG: 04151+2.7.11.1|KEGG: 04714+2.7.11.1|KEGG: 04926+2.7.11.1|KEGG: 05165+2.7.11.1
FtPinG0001529700.01.T01	PIRSF	PIRSF000654
FtPinG0006163100.01.T01	PRINTS	PR00461	Plant peroxidase signature	IPR000823	Plant peroxidase	GO:0004601|GO:0006979|GO:0020037|GO:0055114	KEGG: 00940+1.11.1.7|MetaCyc: PWY-5461|MetaCyc: PWY-5466|MetaCyc: PWY-5469|MetaCyc: PWY-6824|MetaCyc: PWY-7214|MetaCyc: PWY-7445
FtPinG0006163100.01.T01	PRINTS	PR00461	Plant peroxidase signature	IPR000823	Plant peroxidase	GO:0004601|GO:0006979|GO:0020037|GO:0055114	KEGG: 00940+1.11.1.7|MetaCyc: PWY-5461|MetaCyc: PWY-5466|MetaCyc: PWY-5469|MetaCyc: PWY-6824|MetaCyc: PWY-7214|MetaCyc: PWY-7445
FtPinG0006163100.01.T01	PRINTS	PR00461	Plant peroxidase signature	IPR000823	Plant peroxidase	GO:0004601|GO:0006979|GO:0020037|GO:0055114	KEGG: 00940+1.11.1.7|MetaCyc: PWY-5461|MetaCyc: PWY-5466|MetaCyc: PWY-5469|MetaCyc: PWY-6824|MetaCyc: PWY-7214|MetaCyc: PWY-7445
FtPinG0006163100.01.T01	PRINTS	PR00461	Plant peroxidase signature	IPR000823	Plant peroxidase	GO:0004601|GO:0006979|GO:0020037|GO:0055114	KEGG: 00940+1.11.1.7|MetaCyc: PWY-5461|MetaCyc: PWY-5466|MetaCyc: PWY-5469|MetaCyc: PWY-6824|MetaCyc: PWY-7214|MetaCyc: PWY-7445
FtPinG0006163100.01.T01	PRINTS	PR00461	Plant peroxidase signature	IPR000823	Plant peroxidase	GO:0004601|GO:0006979|GO:0020037|GO:0055114	KEGG: 00940+1.11.1.7|MetaCyc: PWY-5461|MetaCyc: PWY-5466|MetaCyc: PWY-5469|MetaCyc: PWY-6824|MetaCyc: PWY-7214|MetaCyc: PWY-7445
FtPinG0006163100.01.T01	PRINTS	PR00461	Plant peroxidase signature	IPR000823	Plant peroxidase	GO:0004601|GO:0006979|GO:0020037|GO:0055114	KEGG: 00940+1.11.1.7|MetaCyc: PWY-5461|MetaCyc: PWY-5466|MetaCyc: PWY-5469|MetaCyc: PWY-6824|MetaCyc: PWY-7214|MetaCyc: PWY-7445
FtPinG0006163100.01.T01	PRINTS	PR00461	Plant peroxidase signature	IPR000823	Plant peroxidase	GO:0004601|GO:0006979|GO:0020037|GO:0055114	KEGG: 00940+1.11.1.7|MetaCyc: PWY-5461|MetaCyc: PWY-5466|MetaCyc: PWY-5469|MetaCyc: PWY-6824|MetaCyc: PWY-7214|MetaCyc: PWY-7445
FtPinG0006163100.01.T01	PRINTS	PR00461	Plant peroxidase signature	IPR000823	Plant peroxidase	GO:0004601|GO:0006979|GO:0020037|GO:0055114	KEGG: 00940+1.11.1.7|MetaCyc: PWY-5461|MetaCyc: PWY-5466|MetaCyc: PWY-5469|MetaCyc: PWY-6824|MetaCyc: PWY-7214|MetaCyc: PWY-7445
FtPinG0006163100.01.T01	PRINTS	PR00461	Plant peroxidase signature	IPR000823	Plant peroxidase	GO:0004601|GO:0006979|GO:0020037|GO:0055114	KEGG: 00940+1.11.1.7|MetaCyc: PWY-5461|MetaCyc: PWY-5466|MetaCyc: PWY-5469|MetaCyc: PWY-6824|MetaCyc: PWY-7214|MetaCyc: PWY-7445
FtPinG0006163100.01.T01	SUPERFAMILY	SSF48113		IPR010255	Haem peroxidase	GO:0004601|GO:0006979|GO:0020037|GO:0055114
FtPinG0006163100.01.T01	ProSiteProfiles	PS50873	Plant heme peroxidase family profile.	IPR002016	Haem peroxidase, plant/fungal/bacterial	GO:0004601|GO:0006979|GO:0020037|GO:0055114
FtPinG0006163100.01.T01	Gene3D	G3DSA:1.10.420.10
FtPinG0006163100.01.T01	ProSitePatterns	PS00435	Peroxidases proximal heme-ligand signature.	IPR019793	Peroxidases heam-ligand binding site		Reactome: R-HSA-2408557
FtPinG0006163100.01.T01	CDD	cd00693	secretory_peroxidase	IPR033905	Secretory peroxidase	GO:0004601|GO:0042744	KEGG: 00940+1.11.1.7|MetaCyc: PWY-5461|MetaCyc: PWY-5466|MetaCyc: PWY-5469|MetaCyc: PWY-6824|MetaCyc: PWY-7214|MetaCyc: PWY-7445
FtPinG0006163100.01.T01	Pfam	PF00141	Peroxidase	IPR002016	Haem peroxidase, plant/fungal/bacterial	GO:0004601|GO:0006979|GO:0020037|GO:0055114
FtPinG0006163100.01.T01	PRINTS	PR00458	Haem peroxidase superfamily signature	IPR002016	Haem peroxidase, plant/fungal/bacterial	GO:0004601|GO:0006979|GO:0020037|GO:0055114
FtPinG0006163100.01.T01	PRINTS	PR00458	Haem peroxidase superfamily signature	IPR002016	Haem peroxidase, plant/fungal/bacterial	GO:0004601|GO:0006979|GO:0020037|GO:0055114
FtPinG0006163100.01.T01	PRINTS	PR00458	Haem peroxidase superfamily signature	IPR002016	Haem peroxidase, plant/fungal/bacterial	GO:0004601|GO:0006979|GO:0020037|GO:0055114
FtPinG0006163100.01.T01	PRINTS	PR00458	Haem peroxidase superfamily signature	IPR002016	Haem peroxidase, plant/fungal/bacterial	GO:0004601|GO:0006979|GO:0020037|GO:0055114
FtPinG0006163100.01.T01	PRINTS	PR00458	Haem peroxidase superfamily signature	IPR002016	Haem peroxidase, plant/fungal/bacterial	GO:0004601|GO:0006979|GO:0020037|GO:0055114
FtPinG0006163100.01.T01	Gene3D	G3DSA:1.10.520.10
FtPinG0006163100.01.T01	Gene3D	G3DSA:1.10.520.10
FtPinG0006163100.01.T01	ProSitePatterns	PS00436	Peroxidases active site signature.	IPR019794	Peroxidase, active site	GO:0004601|GO:0055114
FtPinG0005355100.01.T01	Gene3D	G3DSA:1.10.390.10		IPR027268	Peptidase M4/M1, CTD superfamily
FtPinG0005355100.01.T01	CDD	cd09600	M1_APN_1	IPR012779	Peptidase M1, alanyl aminopeptidase	GO:0008270
FtPinG0005355100.01.T01	SUPERFAMILY	SSF55486
FtPinG0005355100.01.T01	Pfam	PF17432	Domain of unknown function (DUF3458_C) ARM repeats	IPR024601	Peptidase M1, alanyl aminopeptidase, C-terminal
FtPinG0005355100.01.T01	Pfam	PF01433	Peptidase family M1 domain	IPR014782	Peptidase M1, membrane alanine aminopeptidase, N-terminal	GO:0008237|GO:0008270
FtPinG0005355100.01.T01	Gene3D	G3DSA:1.10.1740.60
FtPinG0005355100.01.T01	SUPERFAMILY	SSF63737
FtPinG0005355100.01.T01	TIGRFAM	TIGR02414	pepN_proteo: aminopeptidase N	IPR012779	Peptidase M1, alanyl aminopeptidase	GO:0008270
FtPinG0005355100.01.T01	PRINTS	PR00756	Membrane alanyl dipeptidase (M1) family signature	IPR014782	Peptidase M1, membrane alanine aminopeptidase, N-terminal	GO:0008237|GO:0008270
FtPinG0005355100.01.T01	PRINTS	PR00756	Membrane alanyl dipeptidase (M1) family signature	IPR014782	Peptidase M1, membrane alanine aminopeptidase, N-terminal	GO:0008237|GO:0008270
FtPinG0005355100.01.T01	PRINTS	PR00756	Membrane alanyl dipeptidase (M1) family signature	IPR014782	Peptidase M1, membrane alanine aminopeptidase, N-terminal	GO:0008237|GO:0008270
FtPinG0005355100.01.T01	PRINTS	PR00756	Membrane alanyl dipeptidase (M1) family signature	IPR014782	Peptidase M1, membrane alanine aminopeptidase, N-terminal	GO:0008237|GO:0008270
FtPinG0005355100.01.T01	Pfam	PF11940	Domain of unknown function (DUF3458) Ig-like fold	IPR035414	Peptidase M1, alanyl aminopeptidase, Ig-like fold
FtPinG0005355100.01.T01	Gene3D	G3DSA:1.25.50.10		IPR037144	Peptidase M1, alanyl aminopeptidase, C-terminal domain superfamily
FtPinG0005355100.01.T01	Gene3D	G3DSA:2.60.40.1730
FtPinG0005355100.01.T01	Gene3D	G3DSA:2.60.40.1840		IPR038438	Alanyl aminopeptidase, Ig-like domain superfamily
FtPinG0006104000.01.T01	CDD	cd01117	YbiR_permease
FtPinG0006104000.01.T01	Pfam	PF03600	Citrate transporter	IPR004680	Citrate transporter-like domain	GO:0016021|GO:0055085	Reactome: R-HSA-5662702
FtPinG0006104000.01.T01	PRINTS	PR00758	Arsenical pump membrane protein signature	IPR000802	Arsenical pump membrane protein, ArsB	GO:0015105|GO:0015700|GO:0016021
FtPinG0006104000.01.T01	PRINTS	PR00758	Arsenical pump membrane protein signature	IPR000802	Arsenical pump membrane protein, ArsB	GO:0015105|GO:0015700|GO:0016021
FtPinG0009546300.01.T01	Gene3D	G3DSA:1.10.1620.20		IPR036742	ATP synthase, F1 complex, epsilon subunit superfamily, mitochondrial	GO:0000275|GO:0015986|GO:0046933
FtPinG0009546300.01.T01	Pfam	PF04627	Mitochondrial ATP synthase epsilon chain	IPR006721	ATP synthase, F1 complex, epsilon subunit, mitochondrial	GO:0000275|GO:0015986|GO:0046933
FtPinG0009546300.01.T01	SUPERFAMILY	SSF48690		IPR036742	ATP synthase, F1 complex, epsilon subunit superfamily, mitochondrial	GO:0000275|GO:0015986|GO:0046933
FtPinG0009546300.01.T01	CDD	cd12153	F1-ATPase_epsilon	IPR006721	ATP synthase, F1 complex, epsilon subunit, mitochondrial	GO:0000275|GO:0015986|GO:0046933
FtPinG0009546300.01.T02	SUPERFAMILY	SSF48690		IPR036742	ATP synthase, F1 complex, epsilon subunit superfamily, mitochondrial	GO:0000275|GO:0015986|GO:0046933
FtPinG0009546300.01.T02	Gene3D	G3DSA:1.10.1620.20		IPR036742	ATP synthase, F1 complex, epsilon subunit superfamily, mitochondrial	GO:0000275|GO:0015986|GO:0046933
FtPinG0009546300.01.T02	Pfam	PF04627	Mitochondrial ATP synthase epsilon chain	IPR006721	ATP synthase, F1 complex, epsilon subunit, mitochondrial	GO:0000275|GO:0015986|GO:0046933
FtPinG0009546300.01.T02	CDD	cd12153	F1-ATPase_epsilon	IPR006721	ATP synthase, F1 complex, epsilon subunit, mitochondrial	GO:0000275|GO:0015986|GO:0046933
FtPinG0006495600.01.T01	SUPERFAMILY	SSF53335		IPR029063	S-adenosyl-L-methionine-dependent methyltransferase
FtPinG0006495600.01.T01	Pfam	PF13847	Methyltransferase domain	IPR025714	Methyltransferase domain
FtPinG0006495600.01.T01	Gene3D	G3DSA:3.40.50.150
FtPinG0006323500.01.T01	Gene3D	G3DSA:1.10.510.10
FtPinG0006323500.01.T01	ProSiteProfiles	PS50011	Protein kinase domain profile.	IPR000719	Protein kinase domain	GO:0004672|GO:0005524|GO:0006468
FtPinG0006323500.01.T01	PIRSF	PIRSF000654
FtPinG0006323500.01.T01	Pfam	PF00069	Protein kinase domain	IPR000719	Protein kinase domain	GO:0004672|GO:0005524|GO:0006468
FtPinG0006323500.01.T01	SUPERFAMILY	SSF56112		IPR011009	Protein kinase-like domain superfamily
FtPinG0006323500.01.T01	SMART	SM00220		IPR000719	Protein kinase domain	GO:0004672|GO:0005524|GO:0006468
FtPinG0006323500.01.T01	Gene3D	G3DSA:3.30.200.20
FtPinG0006323500.01.T01	ProSitePatterns	PS00108	Serine/Threonine protein kinases active-site signature.	IPR008271	Serine/threonine-protein kinase, active site	GO:0004672|GO:0006468
FtPinG0006324300.01.T01	Pfam	PF01928	CYTH domain	IPR023577	CYTH domain		Reactome: R-HSA-196819
FtPinG0006324300.01.T01	SUPERFAMILY	SSF55154		IPR033469	CYTH-like domain superfamily		Reactome: R-HSA-196819
FtPinG0006324300.01.T01	SUPERFAMILY	SSF55154		IPR033469	CYTH-like domain superfamily		Reactome: R-HSA-196819
FtPinG0006324300.01.T01	ProDom	PD009560	CYCLASE ADENYLATE CYCLASE ADENYLYL CYAB LYASE CLASS CYAB-TYPE THERMOPHILIC MJ0240
FtPinG0006324300.01.T01	CDD	cd07374	CYTH-like_Pase
FtPinG0006324300.01.T01	Gene3D	G3DSA:2.40.320.10
FtPinG0006324300.01.T01	ProSiteProfiles	PS51707	CYTH domain profile.	IPR023577	CYTH domain		Reactome: R-HSA-196819
FtPinG0006324300.01.T01	SMART	SM01118		IPR023577	CYTH domain		Reactome: R-HSA-196819
FtPinG0007911300.01.T01	Pfam	PF00361	Proton-conducting membrane transporter	IPR001750	NADH:quinone oxidoreductase/Mrp antiporter, membrane subunit		Reactome: R-HSA-611105|Reactome: R-HSA-6799198
FtPinG0005259000.01.T01	ProSitePatterns	PS00108	Serine/Threonine protein kinases active-site signature.	IPR008271	Serine/threonine-protein kinase, active site	GO:0004672|GO:0006468
FtPinG0005259000.01.T01	SMART	SM00220		IPR000719	Protein kinase domain	GO:0004672|GO:0005524|GO:0006468
FtPinG0005259000.01.T01	PIRSF	PIRSF000654
FtPinG0005259000.01.T01	ProSiteProfiles	PS50011	Protein kinase domain profile.	IPR000719	Protein kinase domain	GO:0004672|GO:0005524|GO:0006468
FtPinG0005259000.01.T01	ProSitePatterns	PS00107	Protein kinases ATP-binding region signature.	IPR017441	Protein kinase, ATP binding site	GO:0005524
FtPinG0005259000.01.T01	Gene3D	G3DSA:1.10.510.10
FtPinG0005259000.01.T01	Pfam	PF07714	Protein tyrosine kinase	IPR001245	Serine-threonine/tyrosine-protein kinase, catalytic domain	GO:0004672|GO:0006468
FtPinG0005259000.01.T01	SUPERFAMILY	SSF56112		IPR011009	Protein kinase-like domain superfamily
FtPinG0005259000.01.T01	Gene3D	G3DSA:3.30.200.20
FtPinG0007534900.01.T01	Gene3D	G3DSA:2.60.120.620
FtPinG0007534900.01.T01	SMART	SM00254		IPR003582	ShKT domain
FtPinG0007534900.01.T01	ProSiteProfiles	PS51471	Fe(2+) 2-oxoglutarate dioxygenase domain profile.	IPR005123	Oxoglutarate/iron-dependent dioxygenase	GO:0016491|GO:0055114
FtPinG0007534900.01.T01	ProSiteProfiles	PS51670	ShKT domain profile.	IPR003582	ShKT domain
FtPinG0007534900.01.T01	SMART	SM00702		IPR006620	Prolyl 4-hydroxylase, alpha subunit	GO:0005506|GO:0016705|GO:0031418|GO:0055114
FtPinG0007534900.01.T01	Pfam	PF13640	2OG-Fe(II) oxygenase superfamily	IPR005123	Oxoglutarate/iron-dependent dioxygenase	GO:0016491|GO:0055114
FtPinG0007535500.01.T01	MobiDBLite	mobidb-lite	consensus disorder prediction
FtPinG0007535500.01.T01	Pfam	PF11926	Domain of unknown function (DUF3444)	IPR024593	Domain of unknown function DUF3444
FtPinG0003509800.01.T01	Gene3D	G3DSA:3.90.1720.30
FtPinG0003509800.01.T01	Pfam	PF05903	PPPDE putative peptidase domain	IPR008580	PPPDE putative peptidase domain
FtPinG0003509800.01.T01	MobiDBLite	mobidb-lite	consensus disorder prediction
FtPinG0003509800.01.T01	SMART	SM01179		IPR008580	PPPDE putative peptidase domain
FtPinG0008630900.01.T01	Pfam	PF09335	SNARE associated Golgi protein	IPR032816	SNARE associated Golgi protein
FtPinG0007081300.01.T01	Gene3D	G3DSA:3.80.10.10		IPR032675	Leucine-rich repeat domain superfamily
FtPinG0007081300.01.T01	SUPERFAMILY	SSF52047
FtPinG0004724200.01.T01	Pfam	PF00168	C2 domain	IPR000008	C2 domain
FtPinG0004724200.01.T01	ProSiteProfiles	PS50004	C2 domain profile.	IPR000008	C2 domain
FtPinG0004724200.01.T01	SUPERFAMILY	SSF49562
FtPinG0004724200.01.T01	SMART	SM00239		IPR000008	C2 domain
FtPinG0007083200.01.T01	ProSitePatterns	PS00475	Ribosomal protein L15 signature.	IPR001196	Ribosomal protein L15, conserved site	GO:0003735|GO:0005622|GO:0005840|GO:0006412	Reactome: R-HSA-156827|Reactome: R-HSA-156902|Reactome: R-HSA-1799339|Reactome: R-HSA-192823|Reactome: R-HSA-2408557|Reactome: R-HSA-6791226|Reactome: R-HSA-72689|Reactome: R-HSA-72706|Reactome: R-HSA-72764|Reactome: R-HSA-9010553|Reactome: R-HSA-975956|Reactome: R-HSA-975957
FtPinG0007083200.01.T01	Pfam	PF00828	Ribosomal proteins 50S-L15, 50S-L18e, 60S-L27A	IPR021131	Ribosomal protein L18e/L15P
FtPinG0007083200.01.T01	TIGRFAM	TIGR01071	rplO_bact: ribosomal protein uL15	IPR005749	Ribosomal protein L15, bacterial-type	GO:0003735|GO:0006412|GO:0015934	Reactome: R-HSA-5368286|Reactome: R-HSA-5389840|Reactome: R-HSA-5419276
FtPinG0007083200.01.T01	Hamap	MF_01341	50S ribosomal protein L15 [rplO].	IPR030878	Ribosomal protein L15	GO:0003735|GO:0006412|GO:0015934
FtPinG0007083200.01.T01	MobiDBLite	mobidb-lite	consensus disorder prediction
FtPinG0007083200.01.T01	SUPERFAMILY	SSF52080		IPR036227	Ribosomal L18e/L15P superfamily
FtPinG0007083200.01.T01	Gene3D	G3DSA:3.100.10.10
FtPinG0001529600.01.T01	Pfam	PF07173	Glycine-rich domain-containing protein-like	IPR009836	Glycine-rich domain-containing protein-like
FtPinG0001529600.01.T01	Pfam	PF07173	Glycine-rich domain-containing protein-like	IPR009836	Glycine-rich domain-containing protein-like
FtPinG0005355500.01.T01	Gene3D	G3DSA:3.50.30.30
FtPinG0005355500.01.T01	Pfam	PF02225	PA domain	IPR003137	PA domain
FtPinG0005355500.01.T01	SUPERFAMILY	SSF52025
FtPinG0005355500.01.T01	Pfam	PF04258	Signal peptide peptidase	IPR007369	Peptidase A22B, signal peptide peptidase	GO:0004190|GO:0016021
FtPinG0005355500.01.T01	SMART	SM00730		IPR006639	Presenilin/signal peptide peptidase	GO:0004190|GO:0016021
FtPinG0009458700.01.T01	MobiDBLite	mobidb-lite	consensus disorder prediction
FtPinG0009458700.01.T01	Gene3D	G3DSA:3.40.50.150
FtPinG0009458700.01.T01	SUPERFAMILY	SSF53335		IPR029063	S-adenosyl-L-methionine-dependent methyltransferase
FtPinG0009458700.01.T01	Pfam	PF10294	Lysine methyltransferase	IPR019410	Lysine methyltransferase
FtPinG0003491500.01.T01	Pfam	PF00224	Pyruvate kinase, barrel domain	IPR015793	Pyruvate kinase, barrel	GO:0000287|GO:0004743|GO:0006096|GO:0030955	KEGG: 00010+2.7.1.40|KEGG: 00230+2.7.1.40|KEGG: 00620+2.7.1.40|MetaCyc: PWY-1042|MetaCyc: PWY-2221|MetaCyc: PWY-5484|MetaCyc: PWY-5723|MetaCyc: PWY-6142|MetaCyc: PWY-6886|MetaCyc: PWY-6901|MetaCyc: PWY-7003|MetaCyc: PWY-7218|MetaCyc: PWY-7383|Reactome: R-HSA-70171
FtPinG0003491500.01.T01	SUPERFAMILY	SSF51621		IPR015813	Pyruvate/Phosphoenolpyruvate kinase-like domain superfamily	GO:0003824
FtPinG0003491500.01.T01	SUPERFAMILY	SSF51621		IPR015813	Pyruvate/Phosphoenolpyruvate kinase-like domain superfamily	GO:0003824
FtPinG0003491500.01.T01	MobiDBLite	mobidb-lite	consensus disorder prediction
FtPinG0003491500.01.T01	SUPERFAMILY	SSF52935		IPR036918	Pyruvate kinase, C-terminal domain superfamily		KEGG: 00010+2.7.1.40|KEGG: 00230+2.7.1.40|KEGG: 00620+2.7.1.40|MetaCyc: PWY-1042|MetaCyc: PWY-2221|MetaCyc: PWY-5484|MetaCyc: PWY-5723|MetaCyc: PWY-6142|MetaCyc: PWY-6886|MetaCyc: PWY-6901|MetaCyc: PWY-7003|MetaCyc: PWY-7218|MetaCyc: PWY-7383|Reactome: R-HSA-70171
FtPinG0003491500.01.T01	Pfam	PF02887	Pyruvate kinase, alpha/beta domain	IPR015795	Pyruvate kinase, C-terminal		KEGG: 00010+2.7.1.40|KEGG: 00230+2.7.1.40|KEGG: 00620+2.7.1.40|MetaCyc: PWY-1042|MetaCyc: PWY-2221|MetaCyc: PWY-5484|MetaCyc: PWY-5723|MetaCyc: PWY-6142|MetaCyc: PWY-6886|MetaCyc: PWY-6901|MetaCyc: PWY-7003|MetaCyc: PWY-7218|MetaCyc: PWY-7383|Reactome: R-HSA-70171
FtPinG0003491500.01.T01	TIGRFAM	TIGR01064	pyruv_kin: pyruvate kinase	IPR001697	Pyruvate kinase	GO:0000287|GO:0004743|GO:0006096|GO:0030955	KEGG: 00010+2.7.1.40|KEGG: 00230+2.7.1.40|KEGG: 00620+2.7.1.40|MetaCyc: PWY-1042|MetaCyc: PWY-2221|MetaCyc: PWY-5484|MetaCyc: PWY-5723|MetaCyc: PWY-6142|MetaCyc: PWY-6886|MetaCyc: PWY-6901|MetaCyc: PWY-7003|MetaCyc: PWY-7218|MetaCyc: PWY-7383|Reactome: R-HSA-70171
FtPinG0003491500.01.T01	Gene3D	G3DSA:2.40.33.10		IPR015806	Pyruvate kinase, insert domain superfamily	GO:0004743|GO:0006096	KEGG: 00010+2.7.1.40|KEGG: 00230+2.7.1.40|KEGG: 00620+2.7.1.40|MetaCyc: PWY-1042|MetaCyc: PWY-2221|MetaCyc: PWY-5484|MetaCyc: PWY-5723|MetaCyc: PWY-6142|MetaCyc: PWY-6886|MetaCyc: PWY-6901|MetaCyc: PWY-7003|MetaCyc: PWY-7218|MetaCyc: PWY-7383|Reactome: R-HSA-70171
FtPinG0003491500.01.T01	Gene3D	G3DSA:3.40.1380.20		IPR036918	Pyruvate kinase, C-terminal domain superfamily		KEGG: 00010+2.7.1.40|KEGG: 00230+2.7.1.40|KEGG: 00620+2.7.1.40|MetaCyc: PWY-1042|MetaCyc: PWY-2221|MetaCyc: PWY-5484|MetaCyc: PWY-5723|MetaCyc: PWY-6142|MetaCyc: PWY-6886|MetaCyc: PWY-6901|MetaCyc: PWY-7003|MetaCyc: PWY-7218|MetaCyc: PWY-7383|Reactome: R-HSA-70171
FtPinG0003491500.01.T01	PRINTS	PR01050	Pyruvate kinase family signature	IPR001697	Pyruvate kinase	GO:0000287|GO:0004743|GO:0006096|GO:0030955	KEGG: 00010+2.7.1.40|KEGG: 00230+2.7.1.40|KEGG: 00620+2.7.1.40|MetaCyc: PWY-1042|MetaCyc: PWY-2221|MetaCyc: PWY-5484|MetaCyc: PWY-5723|MetaCyc: PWY-6142|MetaCyc: PWY-6886|MetaCyc: PWY-6901|MetaCyc: PWY-7003|MetaCyc: PWY-7218|MetaCyc: PWY-7383|Reactome: R-HSA-70171
FtPinG0003491500.01.T01	PRINTS	PR01050	Pyruvate kinase family signature	IPR001697	Pyruvate kinase	GO:0000287|GO:0004743|GO:0006096|GO:0030955	KEGG: 00010+2.7.1.40|KEGG: 00230+2.7.1.40|KEGG: 00620+2.7.1.40|MetaCyc: PWY-1042|MetaCyc: PWY-2221|MetaCyc: PWY-5484|MetaCyc: PWY-5723|MetaCyc: PWY-6142|MetaCyc: PWY-6886|MetaCyc: PWY-6901|MetaCyc: PWY-7003|MetaCyc: PWY-7218|MetaCyc: PWY-7383|Reactome: R-HSA-70171
FtPinG0003491500.01.T01	PRINTS	PR01050	Pyruvate kinase family signature	IPR001697	Pyruvate kinase	GO:0000287|GO:0004743|GO:0006096|GO:0030955	KEGG: 00010+2.7.1.40|KEGG: 00230+2.7.1.40|KEGG: 00620+2.7.1.40|MetaCyc: PWY-1042|MetaCyc: PWY-2221|MetaCyc: PWY-5484|MetaCyc: PWY-5723|MetaCyc: PWY-6142|MetaCyc: PWY-6886|MetaCyc: PWY-6901|MetaCyc: PWY-7003|MetaCyc: PWY-7218|MetaCyc: PWY-7383|Reactome: R-HSA-70171
FtPinG0003491500.01.T01	PRINTS	PR01050	Pyruvate kinase family signature	IPR001697	Pyruvate kinase	GO:0000287|GO:0004743|GO:0006096|GO:0030955	KEGG: 00010+2.7.1.40|KEGG: 00230+2.7.1.40|KEGG: 00620+2.7.1.40|MetaCyc: PWY-1042|MetaCyc: PWY-2221|MetaCyc: PWY-5484|MetaCyc: PWY-5723|MetaCyc: PWY-6142|MetaCyc: PWY-6886|MetaCyc: PWY-6901|MetaCyc: PWY-7003|MetaCyc: PWY-7218|MetaCyc: PWY-7383|Reactome: R-HSA-70171
FtPinG0003491500.01.T01	PRINTS	PR01050	Pyruvate kinase family signature	IPR001697	Pyruvate kinase	GO:0000287|GO:0004743|GO:0006096|GO:0030955	KEGG: 00010+2.7.1.40|KEGG: 00230+2.7.1.40|KEGG: 00620+2.7.1.40|MetaCyc: PWY-1042|MetaCyc: PWY-2221|MetaCyc: PWY-5484|MetaCyc: PWY-5723|MetaCyc: PWY-6142|MetaCyc: PWY-6886|MetaCyc: PWY-6901|MetaCyc: PWY-7003|MetaCyc: PWY-7218|MetaCyc: PWY-7383|Reactome: R-HSA-70171
FtPinG0003491500.01.T01	PRINTS	PR01050	Pyruvate kinase family signature	IPR001697	Pyruvate kinase	GO:0000287|GO:0004743|GO:0006096|GO:0030955	KEGG: 00010+2.7.1.40|KEGG: 00230+2.7.1.40|KEGG: 00620+2.7.1.40|MetaCyc: PWY-1042|MetaCyc: PWY-2221|MetaCyc: PWY-5484|MetaCyc: PWY-5723|MetaCyc: PWY-6142|MetaCyc: PWY-6886|MetaCyc: PWY-6901|MetaCyc: PWY-7003|MetaCyc: PWY-7218|MetaCyc: PWY-7383|Reactome: R-HSA-70171
FtPinG0003491500.01.T01	PRINTS	PR01050	Pyruvate kinase family signature	IPR001697	Pyruvate kinase	GO:0000287|GO:0004743|GO:0006096|GO:0030955	KEGG: 00010+2.7.1.40|KEGG: 00230+2.7.1.40|KEGG: 00620+2.7.1.40|MetaCyc: PWY-1042|MetaCyc: PWY-2221|MetaCyc: PWY-5484|MetaCyc: PWY-5723|MetaCyc: PWY-6142|MetaCyc: PWY-6886|MetaCyc: PWY-6901|MetaCyc: PWY-7003|MetaCyc: PWY-7218|MetaCyc: PWY-7383|Reactome: R-HSA-70171
FtPinG0003491500.01.T01	ProSitePatterns	PS00110	Pyruvate kinase active site signature.	IPR018209	Pyruvate kinase, active site	GO:0004743|GO:0006096	KEGG: 00010+2.7.1.40|KEGG: 00230+2.7.1.40|KEGG: 00620+2.7.1.40|MetaCyc: PWY-1042|MetaCyc: PWY-2221|MetaCyc: PWY-5484|MetaCyc: PWY-5723|MetaCyc: PWY-6142|MetaCyc: PWY-6886|MetaCyc: PWY-6901|MetaCyc: PWY-7003|MetaCyc: PWY-7218|MetaCyc: PWY-7383|Reactome: R-HSA-70171
FtPinG0003491500.01.T01	Gene3D	G3DSA:3.20.20.60
FtPinG0003491500.01.T01	Gene3D	G3DSA:3.20.20.60
FtPinG0003491500.01.T01	SUPERFAMILY	SSF50800		IPR011037	Pyruvate kinase-like, insert domain superfamily
FtPinG0007534300.01.T01	MobiDBLite	mobidb-lite	consensus disorder prediction
FtPinG0007534300.01.T01	Gene3D	G3DSA:1.10.10.790		IPR035967	SWAP/Surp superfamily	GO:0003723|GO:0006396
FtPinG0007534300.01.T01	Pfam	PF01805	Surp module	IPR000061	SWAP/Surp	GO:0003723|GO:0006396
FtPinG0007534300.01.T01	MobiDBLite	mobidb-lite	consensus disorder prediction
FtPinG0007534300.01.T01	SMART	SM00648		IPR000061	SWAP/Surp	GO:0003723|GO:0006396
FtPinG0007534300.01.T01	MobiDBLite	mobidb-lite	consensus disorder prediction
FtPinG0007534300.01.T01	ProSiteProfiles	PS50174	G-patch domain profile.	IPR000467	G-patch domain	GO:0003676
FtPinG0007534300.01.T01	Pfam	PF07713	Protein of unknown function (DUF1604)	IPR011666	G patch domain-containing protein, N-terminal	GO:0006397
FtPinG0007534300.01.T01	ProSiteProfiles	PS50128	SURP motif repeat profile.	IPR000061	SWAP/Surp	GO:0003723|GO:0006396
FtPinG0007534300.01.T01	Coils	Coil
FtPinG0007534300.01.T01	SUPERFAMILY	SSF109905		IPR035967	SWAP/Surp superfamily	GO:0003723|GO:0006396
FtPinG0008630500.01.T01	Pfam	PF00657	GDSL-like Lipase/Acylhydrolase	IPR001087	GDSL lipase/esterase	GO:0016788
FtPinG0008630500.01.T01	Gene3D	G3DSA:3.40.50.1110		IPR036514	SGNH hydrolase superfamily
